# Supplementary material for: Noninvasive imaging of the tumor immune microenvironment correlates with response to immunotherapy in gastric cancer
Source: Nat Commun. 2022 Aug 30;13:5095. doi: 10.1038/s41467-022-32816-w (PMC9427761; doi:10.1038/s41467-022-32816-w)
Supplement: Supplementary file 1 — Supplementary Information [file 41467_2022_32816_MOESM1_ESM.pdf]

## **SUPPLEMENTARY INFORMATION**

**Noninvasive imaging of the tumor immune microenvironment  
correlates with response to immunotherapy in gastric cancer**

**Huang et al.**

## **Supplementary Materials**

- **Supplementary Results**
- **Supplementary Methods**
- **Supplementary Figures**
- **Supplementary Tables**
- **Supplementary Reference**

## Supplementary Results

Development and validation of radiomics image biomarker

The calculation formula of the RS:  $0.02659177 * \text{peri-GLSZM\_ZSV} + 0.04131057 * \text{peri-GLRLM\_RLV} + 0.05502846 * \text{peri-NGTDM\_Busyness} + 0.03061276 * \text{intro-NGTDM\_Busyness\_1.0} - 0.2586982 * \text{intro-NGTDM\_Strength\_1.0} + 0.05465974 * \text{peri-GLRLM\_LRHGE\_2.5} - 0.06194509 * \text{intro-GLCM\_ClusterProminence\_1.0} + 0.16400638 * \text{peri-GLCM\_Correlation\_1.0} + 0.07268216 * \text{intro-GLRLM\_GLN} + 0.33539722 * \text{peri-perimeter}$

In this study, the optimum cutoff values of RS to predict NLR status of TIME were created by the tertiles of the RS in the training cohort. According to the values in the training cohort, when  $RS \geq 0.186$ , patients were divided into RS-High group, and when  $RS < -0.354$ , patients were divided into RS-Low group. While when  $RS \geq -0.354$  but  $< 0.186$ , patients were divided into RS-Middle group.

## Supplementary Methods

Patients

In this study, we retrospectively reviewed data for 2272 patients with gastric cancer from three medical centers. For predicting NLR and survival, the patient inclusion criteria were: histologically confirmed gastric adenocarcinoma; standard unenhanced and contrast-enhanced abdominal CT imaging performed  $< 30$  days before surgical resection; lymphadenectomy performed and  $> 15$  lymph nodes harvested; no preoperative chemotherapy; and complete information about clinicopathological characteristics and follow-up data available. In this study, standard positive threshold

values of CEA and CA19-9 ( $\text{CEA} \geq 5 \text{ ng/mL}$  and  $\text{CA19-9} \geq 37 \text{ U/mL}$ ) were used to divide patients into elevated group and normal group of CEA and CA19-9. We excluded those patients who had other synchronous malignant neoplasms or had received previous anticancer treatment; or if the tumor lesions could not be identified on CT images. For evaluating the response to immunotherapy and clinical outcomes of immunotherapy, the patient inclusion criteria were: histologically confirmed gastric adenocarcinoma; standard unenhanced and contrast-enhanced abdominal CT imaging of primary tumor performed before immunotherapy treatment. Patients were excluded if the clinical response could not be evaluated.

#### Immunohistochemistry staining and definition of NLR status

In this study, neutrophils and lymphocytes at the center of tumor and invasive margin were stained. Formalin-fixed paraffin-embedded (FFPE) samples were processed for IHC staining as previously described<sup>1-3</sup>. The samples were incubated with antibodies against human CD8 (cytotoxic T lymphocytes; NeoMarker, clone SP16, catalog: MA1-39566) and CD66b (neutrophils; BD Pharmingen, clone G10F5, catalog: 561649), following the staining in an EnVision System (Dako) (Supplementary Table 16). Every staining run contained a slide treated with phosphate buffer saline (PBS) buffer in place of the primary antibody as a negative control. Every staining run contained a slide of positive control. Prior to staining, sections were blocked with endogenous peroxidase (prepared in 1%  $\text{H}_2\text{O}_2$ /methanol solution) for 10 minutes and then microwaved for 30 minutes in 10 mM citrate buffer, pH 6.0. The sections were blocked using 10% normal

rabbit serum for 30 minutes. Furthermore, all slides were stained with the same concentrations of primary antibody for each antibody and incubated with monoclonal primary antibody overnight at 4 °C, followed by incubation with an amplification system with a labeled polymer/HRP (EnVision™, DakoCytomation, Denmark) at 37°C for 30 minutes. The sections were developed with 0.05% 3, 3'-diaminobenzidine tetrahydrochloride (DAB) and counterstained with modified Harris hematoxylin. And all slides were stained with DAB dyeing for the same time for each antibody (Supplementary Table 16). Two pathologists (T.L. and S.X. with 5 to 10 years of experience) who were blinded to clinical outcomes independently scored all samples. A third pathologist was consulted when a difference of opinion arose between the 2 primary pathologists. At low power (100), the tissue sections were screened using an inverted research microscope (model DM IRB; Leica, Germany), and the 5 most representative fields were selected. Thereafter, to evaluate the density of stained immune cells, the 2 respective areas of invasive margin and center of tumor were measured at 200 magnification. The nucleated stained cells in each area were quantified and expressed as the number of cells per field.

We evaluated the NLR (the neutrophil count/the lymphocyte count) in invasive margin (peritumoral area) and center of tumor (intratumoral area) respectively. According to different status of NLR in intratumoral and peritumoral area, the NLR status of TIME were finally classified into three types: NLR High (NLR-H:  $\text{NLR} \geq 1$  both in intratumoral and peritumoral tissue); NLR Mix (NLR-M:  $\text{NLR} \geq 1$  in intratumoral tissue and  $\text{NLR} < 1$  in peritumoral tissue, or  $\text{NLR} < 1$  in intratumoral tissue and  $\text{NLR} \geq 1$

in peritumoral tissue); NLR Low (NLR-L:  $\text{NLR} < 1$  in both intratumoral and peritumoral tissue).

Because IHC data was not available for patients in internal validation cohort 2 and external validation cohort 2, these datasets were used to validate the radiomics image biomarker for the prognostic value, and were not used to evaluate the RS prediction of NLR.

#### Image acquisition, processing and feature extraction

For patients who were treated without immunotherapy, portal venous-phase CT images taken before the surgery treatment were obtained from the picture archiving and communication system (PACS, Carestream Canada). For those patients who received immunotherapy, portal venous-phase CT images of primary tumor were obtained before the immunotherapy. All patients underwent contrast-enhanced abdominal CT using the multidetector row CT (MDCT) systems (GE Lightspeed 16, GE Healthcare Milwaukee, WI; 64-section LightSpeed VCT, GE Medical Systems, Milwaukee, WI; USA). Following intravenous contrast administration, arterial and portal venous-phase contrast-enhanced CT scans were performed after delays of 28 s and 60 s, respectively. Iodinated contrast material in the amount of 90 - 100 ml (Ultravist 370, Bayer Schering Pharma, Berlin, Germany) was injected at a rate of 3.0 or 3.5 ml/s with a pump injector (Ulrich CT Plus 150, Ulrich Medical, Ulm, Germany). The CT acquisition protocols were as follows: 120 kV; 150-190 mAs; 0.5- or 0.4-second rotation time. Contrast-enhanced CT was reconstructed with a field of view, 350×350 mm; data matrix,

512×512; in-plane spatial resolution 0.607-0.751 mm; axial slice thickness 5.0 mm for 98% patients with a range of 1.25-7.5 mm.

Because of a coarse resolution in z-axis compared with in-plane resolution, different axial slice thickness may lead to a bias in the synthesized 3D image and potentially higher inter-rater variability, which may adversely affect model performance. Hence, we focused on the most representative image slice, i.e., largest tumor section in the axial plane. Two radiologists (CC and QY who have 12 and 11 years of clinical experience in abdominal CT interpretation respectively) manually segmented the CT images using the ITK-SNAP software ([www.itksnap.org](http://www.itksnap.org)). The CT number (i.e., Hounsfield units) was normalized with the soft tissue window of [-350, 450] HU. Both radiologists were blinded to the clinical and histopathological data but were aware that the patients had gastric cancer. All tumor contours were delineated by the two radiologists in consensus, and any discrepancy was resolved by a third radiologist (Y.X. with 32 years of experience in abdominal CT interpretation). In general, the image processing was followed The Image Biomarker Standardization Initiative (IBSI) guidelines (Supplementary Table 17).

In this study, a total of 584 quantitative features (292 in the peritumoral area and 292 in the intratumoral area, respectively) of each ROI were extracted. The image features included 14 first-order intensity features, 8 shape features, and 270 second- and higher-order textural features. In this work, we investigated four types of texture features on the basis of gray-level co-occurrence matrices (GLCM), gray-level run length matrix (GLRLM), gray-level size zone matrix (GLSZM), and neighborhood gray-tone

difference matrix wavelet decompositions (NGTDM). A Laplacian of Gaussian spatial band-pass filter ( $\nabla^2 G$ ) was used to derive image features at different spatial scales by turning the filter parameter between 1.0 and 2.5 (1.0, 1.5, 2.0, 2.5). All the image features were implemented and computed using an open-source radiomics analysis package in the MATLAB platform (<https://github.com/mvallieres/radiomics>). The source code used in this work is publicly available at [https://github.com/yumingjiang/GC\\_RADIOMICS-.git](https://github.com/yumingjiang/GC_RADIOMICS-.git).

### Classification of RS groups

In this study, the range of the RS in the training is -1.671 to 1.936, and the cutoff value of the bottom and middle tertiles is -0.354, while the cutoff value of the middle and top tertiles is 0.186. Therefore, patients with RS lower than -0.354 were divided into RS-Low group, and patients with RS higher than or equal to 0.186 were divided into RS-High group. While those patients with RS higher than or equal to -0.354 but lower than 0.186 were divided into RS-Middle group.

### Statistical analysis

Redundant and irrelevant features elimination was performed by using the mRMR algorithm in “mRMRe” package; Predictive features selections were performed by using the LASSO logistic regression algorithm in “glmnet” package; ROC curves were plotted by using the “pROC” packages; Nomogram were constructed by using the “rms” package; Survival curves were plotted by using the “survminer” packages.

## Supplementary Figures

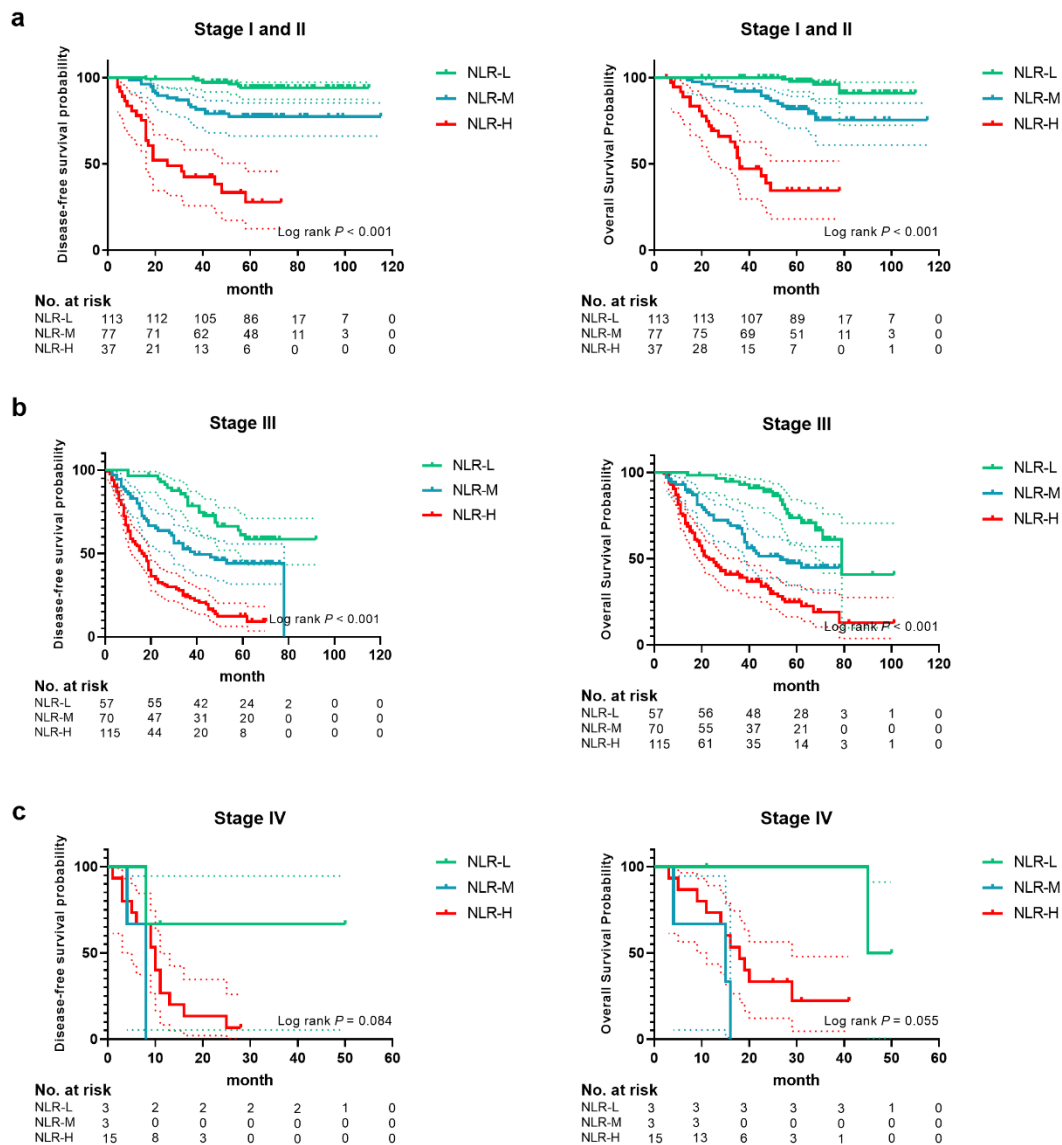

**Supplementary Fig. 1. Kaplan-Meier survival analysis of disease-free survival and overall survival according to the NLR status of TIME in different stage of the training and validation cohort.** a: Patients in stage I and II ( $n = 227$ ), b: Patients in stage III ( $n = 242$ ), c: Patients in stage IV ( $n = 21$ ). NLR: neutrophils-to-lymphocytes ratio, NLR-L: NLR-Low group, NLR-M: NLR-Mix group, NLR-H: NLR-High group, comparisons of the above progression survival curves were performed with a two-sided log-rank test. Dashed lines around the survival curves represent 95% confidence intervals. Source data are provided as a Source Data file.

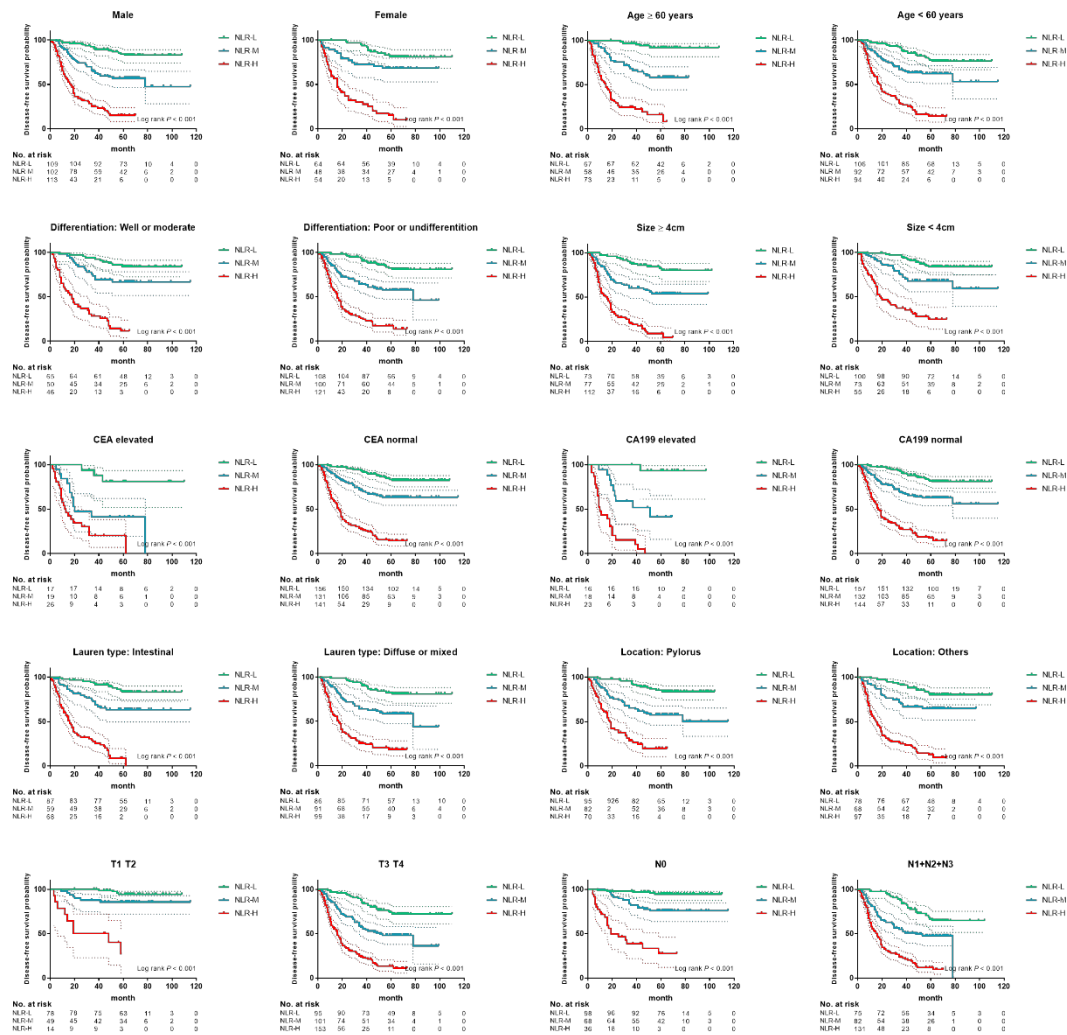

**Supplementary Fig. 2. Kaplan-Meier survival analysis of DFS for patients with NLR status (n = 490) according to the NLR status of TIME stratified by clinicopathological risk factors.** NLR: neutrophils-to-lymphocytes ratio, NLR-L: NLR-Low group, NLR-M: NLR-Mix group, NLR-H: NLR-High group, comparisons of the above progression survival curves were performed with a two-sided log-rank test. Dashed lines around the survival curves represent 95% confidence intervals. Source data are provided as a Source Data file.

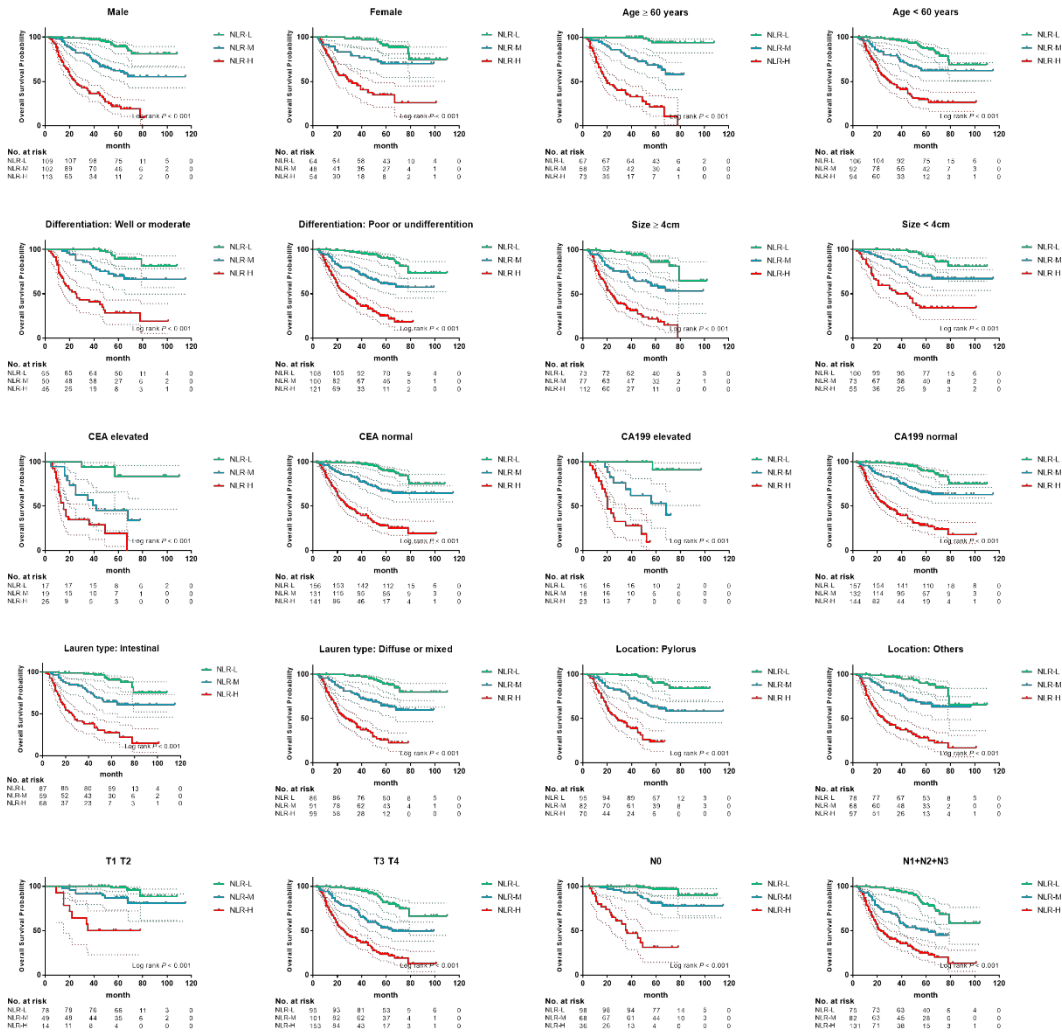

**Supplementary Fig. 3. Kaplan-Meier survival analysis of OS for patients with NLR status (n = 490) according to the NLR status of TIME stratified by clinicopathological risk factors.** NLR: neutrophils-to-lymphocytes ratio, NLR-L: NLR-Low group, NLR-M: NLR-Mix group, NLR-H: NLR-High group, comparisons of the above progression survival curves were performed with a two-sided log-rank test. Dashed lines around the survival curves represent 95% confidence intervals. Source data are provided as a Source Data file.

a. Disease-free survival of each cohort

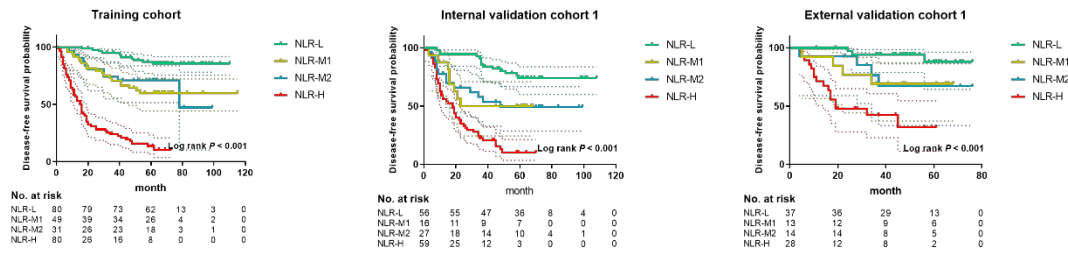

b. Overall survival of each cohort

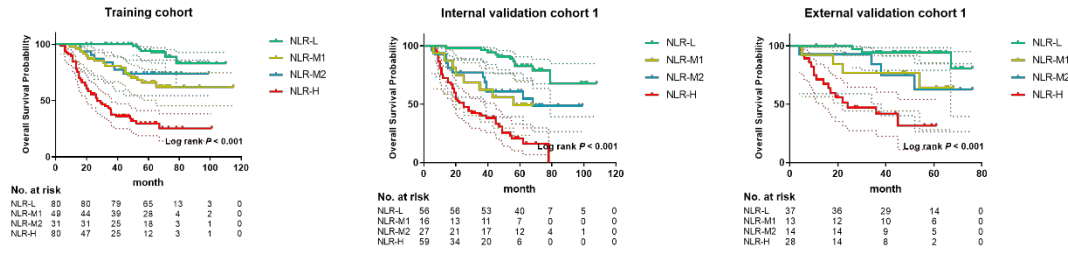

**Supplementary Fig. 4. Kaplan-Meier survival analysis of disease-free survival and overall survival according to the NLR status of TIME in the training, internal validation cohort 1 and external validation cohort 1.** a: disease-free survival, b: overall survival. Training cohort: n=240, internal validation cohort 1: n=158, external validation cohort 1: n=92, NLR: neutrophils-to-lymphocytes ratio, NLR-L: NLR-Low group, NLR-M1: NLR-Mix 1 group, NLR-M2 group: NLR-Mix 2 group, NLR-H: NLR-High group, comparisons of the above progression survival curves were performed with a two-sided log-rank test. Dashed lines around the survival curves represent 95% confidence intervals. Source data are provided as a Source Data file.

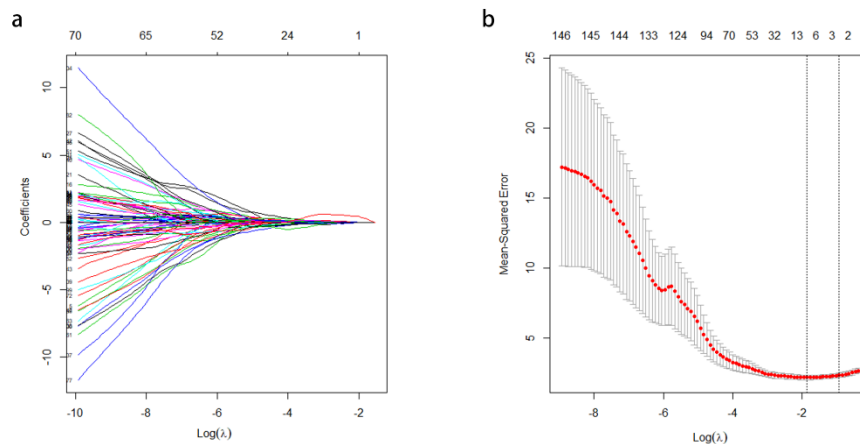

**Supplementary Fig. 5. Texture feature selection using the least absolute shrinkage and selection operator (LASSO) logistic regression model.** a: LASSO coefficient profiles of the image texture feature. A coefficient profile plot was produced against the

log ( $\lambda$ ) sequence, b: tuning parameter ( $\lambda$ ) selection in the LASSO model used 5-fold cross-validation via minimum criteria. Number of features selected corresponding to each lambda are given above the plot. Solid vertical lines represent the mean squared error  $\pm$  SE, the centre red points of the solid vertical lines represent the mean squared error under different  $\lambda$  values, and the error bars indicate the SE. Dotted vertical lines were drawn at the optimal values by using the minimum criteria and 1 standard error of the minimum criteria (the 1-SE criteria). A  $\lambda$  value of 0.1560146, with log ( $\lambda$ ) of -1.857805 was chosen (minimum criteria) according to 5-fold cross-validation. Ten features were selected. SE: standard error. Source data are provided as a Source Data file.

**a. Training cohort**

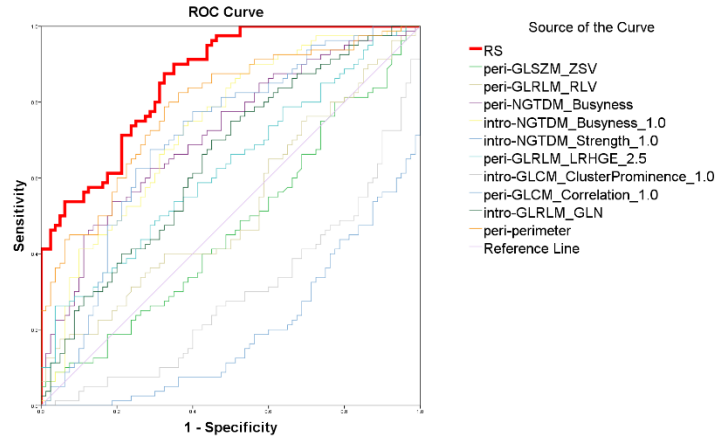

**b. Internal validation cohort 1**

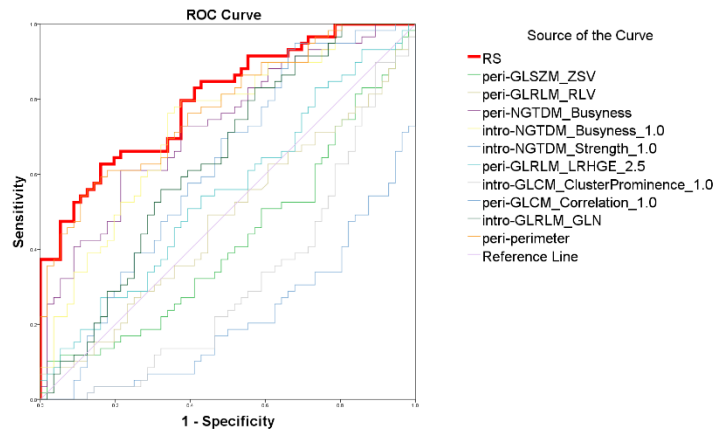

**c. External validation cohort 1**

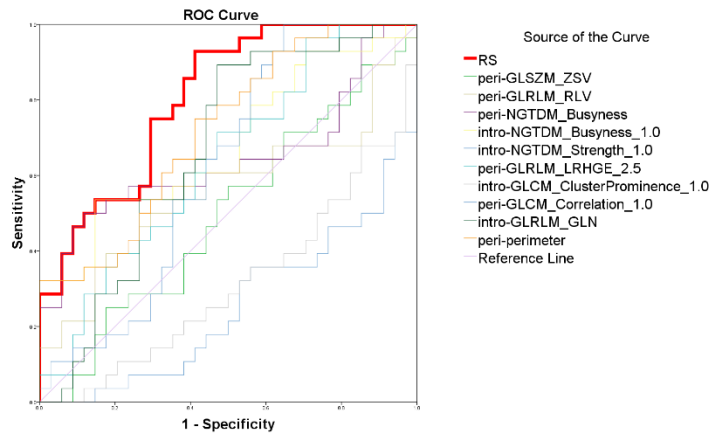

**Supplementary Fig. 6. ROC curves of RS and the ten selected features in predicting NLR status in the training cohort, internal validation cohort 1, and external validation 1. RS: radiomics score. Source data are provided as a Source Data file.**

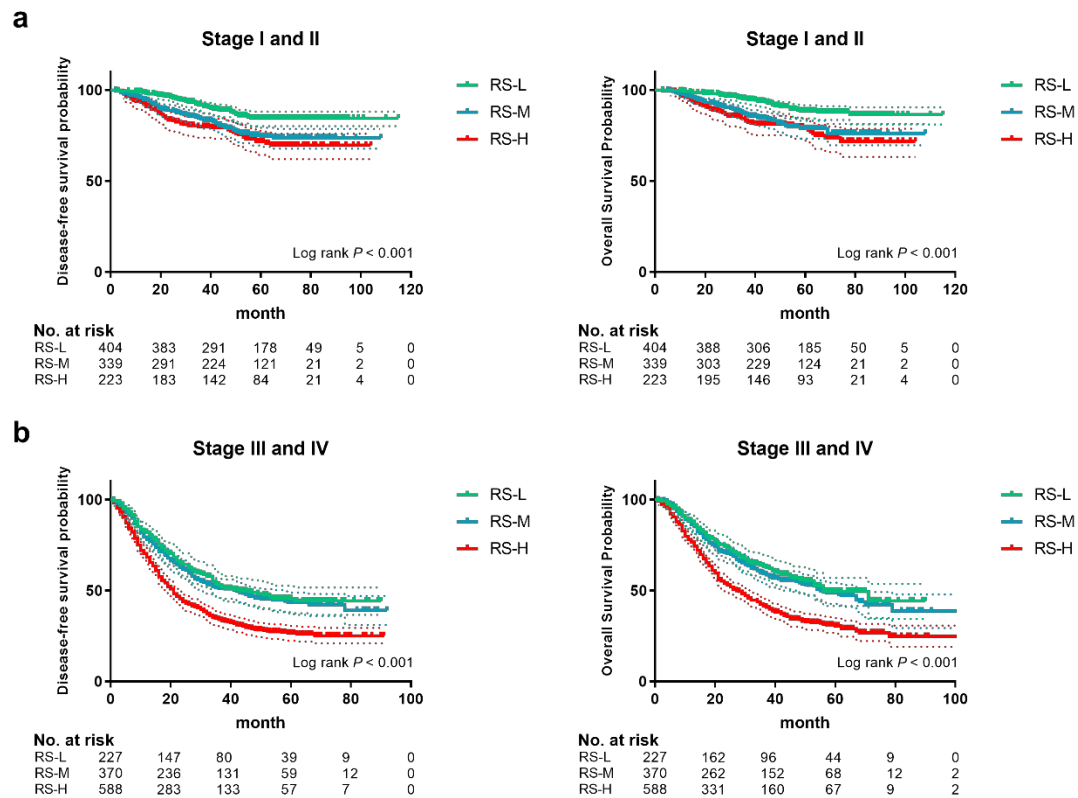

**Supplementary Fig. 7. Kaplan-Meier survival analysis of disease-free survival and overall survival according to the RS groups in patients with different stage of the training and validation cohorts. a: Stage I and II ( $n = 966$ ), b: Stage III and IV ( $n = 1185$ ). RS-L: RS-Low group, RS-M: RS-Middle group, RS-H: RS-High group, comparisons of the above progression survival curves were performed with a two-sided log-rank test. Dashed lines around the survival curves represent 95% confidence intervals. Source data are provided as a Source Data file.**

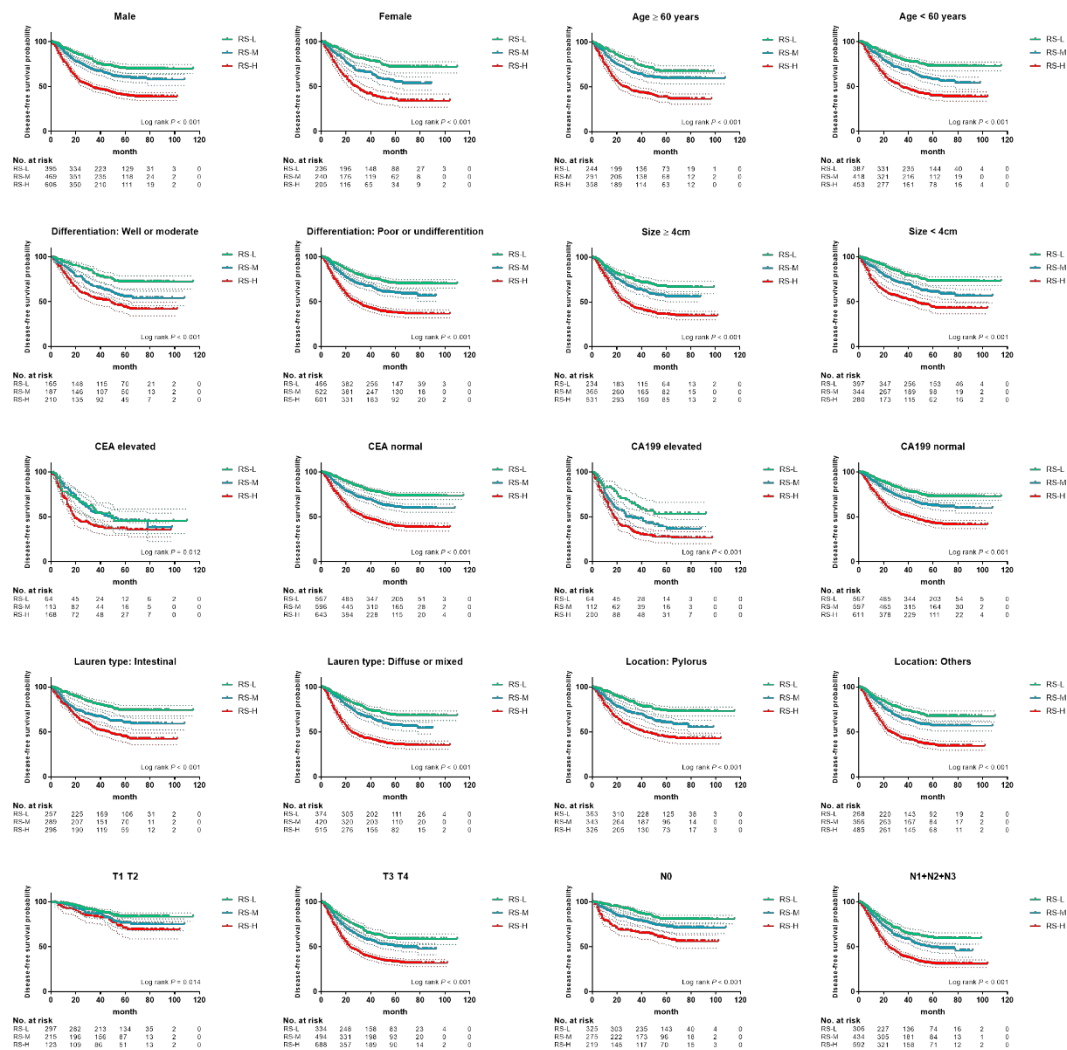

**Supplementary Fig. 8. Kaplan-Meier survival analysis of DFS for all the 2,151 patients according to the RS groups stratified by clinicopathological risk factors.** RS-L: RS-Low group, RS-M: RS-Middle group, RS-H: RS-High group, comparisons of the above progression survival curves were performed with a two-sided log-rank test. Dashed lines around the survival curves represent 95% confidence intervals. Source data are provided as a Source Data file.

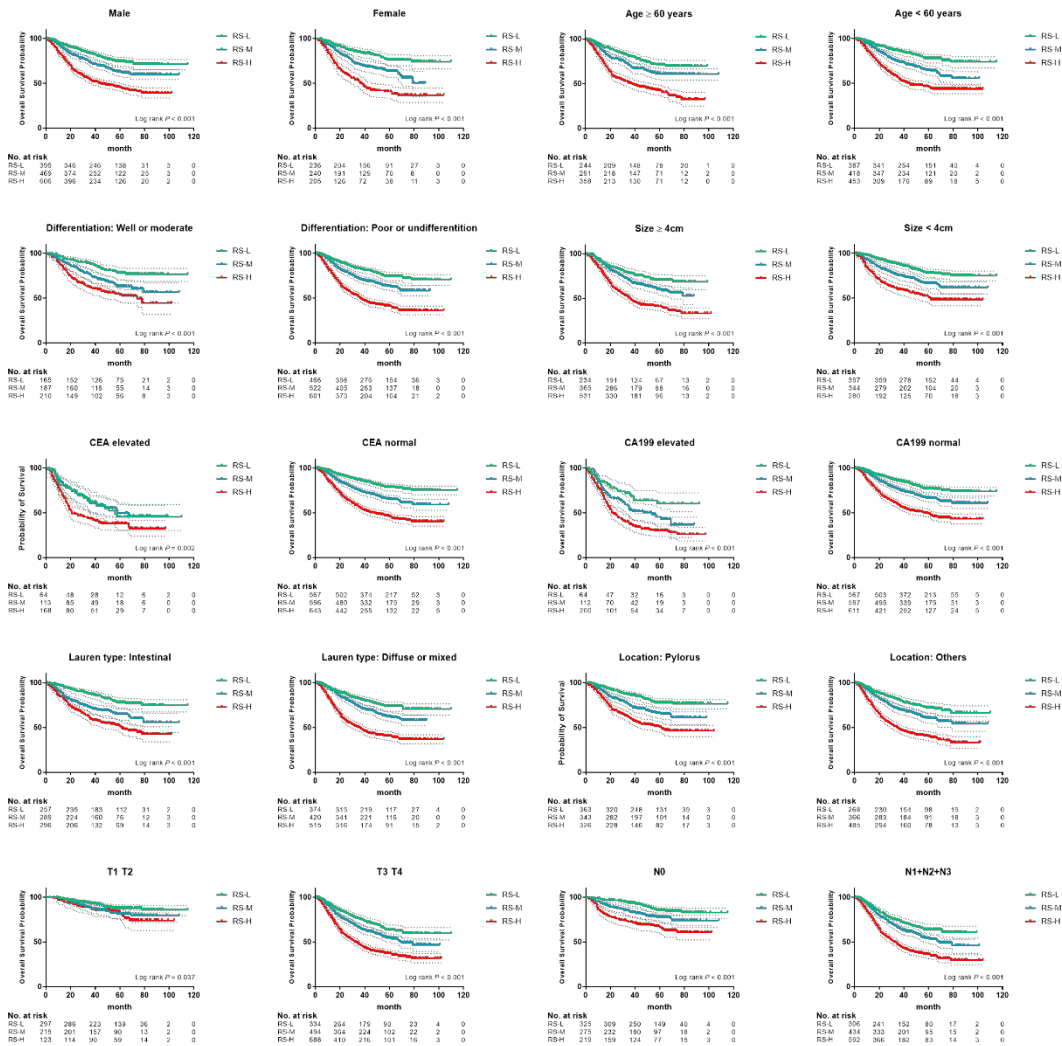

**Supplementary Fig. 9. Kaplan-Meier survival analysis of OS for all the 2,151 patients according to the RS groups stratified by clinicopathological risk factors.** RS-L: RS-Low group, RS-M: RS-Middle group, RS-H: RS-High group, comparisons of the above progression survival curves were performed with a two-sided log-rank test. Dashed lines around the survival curves represent 95% confidence intervals. Source data are provided as a Source Data file.

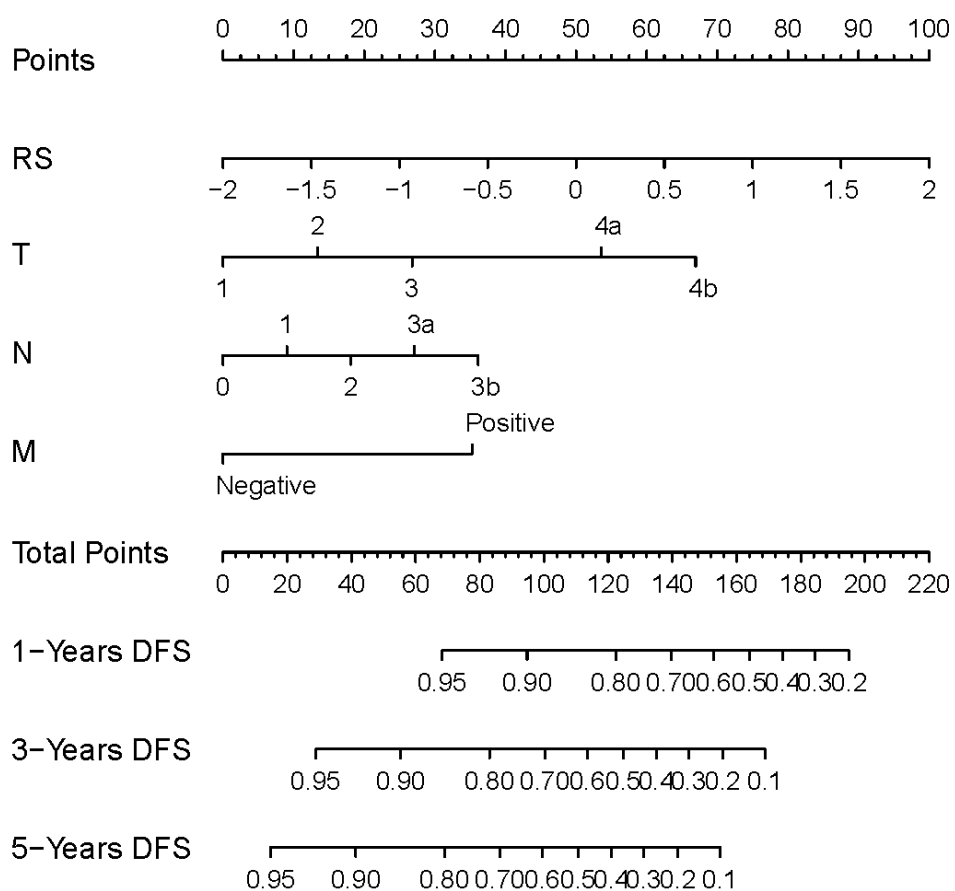

**Supplementary Fig. 10. Integrated nomograms to predict 1-, 3-, 5- year DFS for patients with gastric cancer.** To determine how many points toward the probability of DFS, the patient receives for his or her RS, locate the patient's RS on the RS axis, draw a line straight upward to the point axis, repeat this process for each variable, sum the points achieved for each of the risk factors, locate the final sum on the Total Point axis, and draw a line straight down to find the patient's probability of DFS. Source data are provided as a Source Data file.

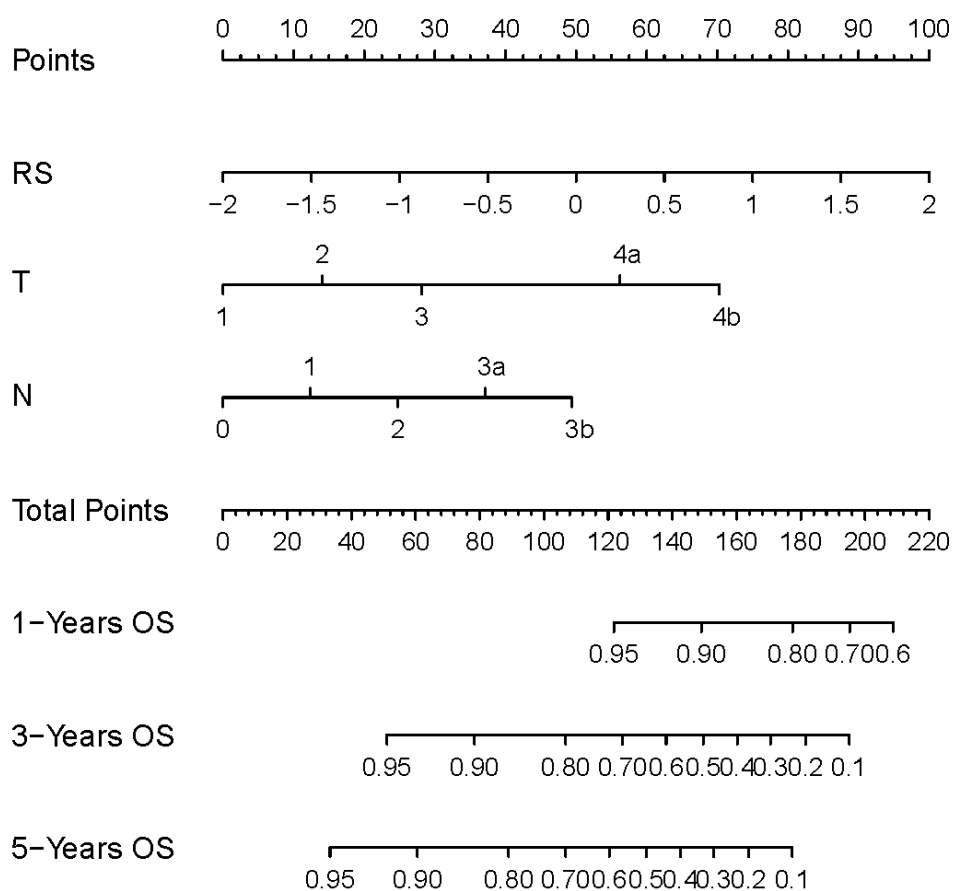

**Supplementary Fig. 11. Integrated nomograms to predict 1-, 3-, 5- year OS for patients with gastric cancer.** To determine how many points toward the probability of OS, the patient receives for his or her RS, locate the patient's RS on the RS axis, draw a line straight upward to the point axis, repeat this process for each variable, sum the points achieved for each of the risk factors, locate the final sum on the Total Point axis, and draw a line straight down to find the patient's probability of OS. Source data are provided as a Source Data file.

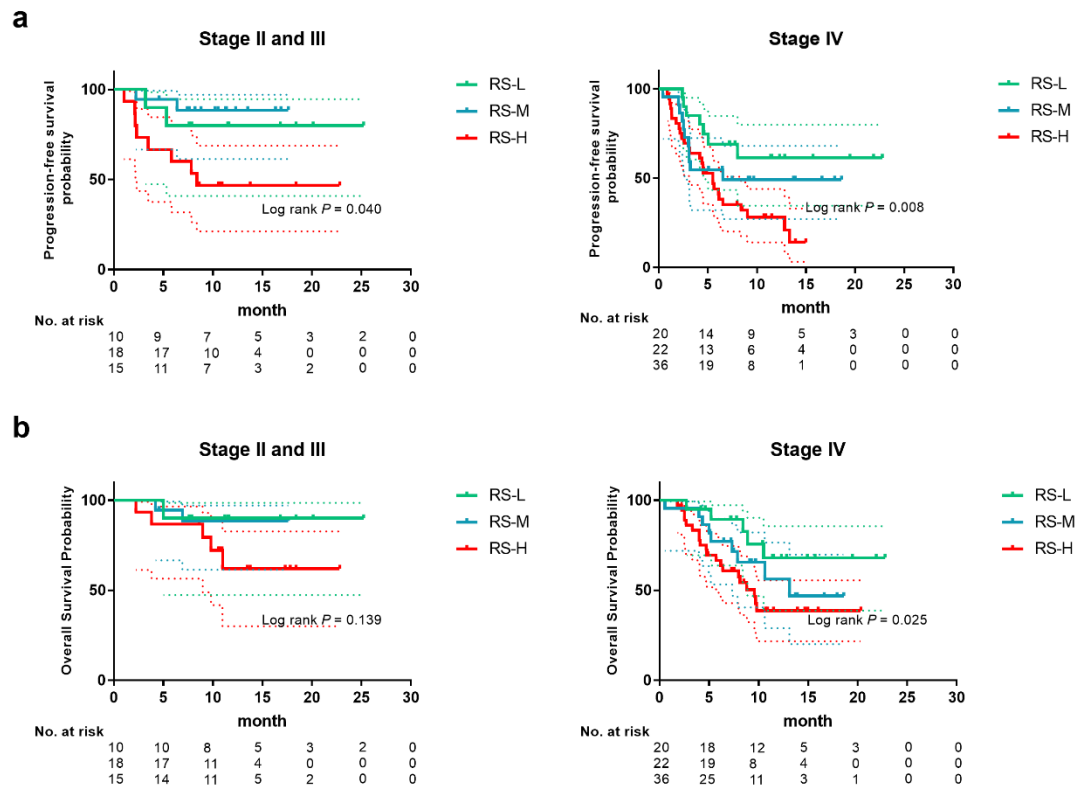

**Supplementary Fig. 12. Kaplan-Meier survival analysis of PFS and OS for patients who received immunotherapy according to the RS groups stratified by stage of disease.** a: disease-free survival. b: overall survival. RS-L: RS-Low group, RS-M: RS-Middle group, RS-H: RS-High group, comparisons of the above progression survival curves were performed with a two-sided log-rank test. Dashed lines around the survival curves represent 95% confidence intervals. Source data are provided as a Source Data file.

**a. First Line Treatment**

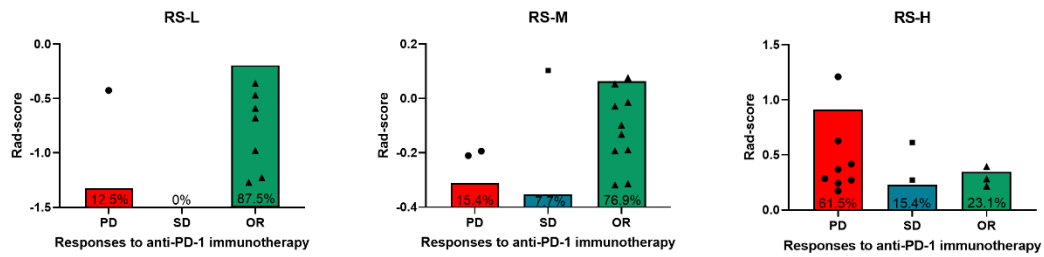

**b. Second or Third Line Treatment**

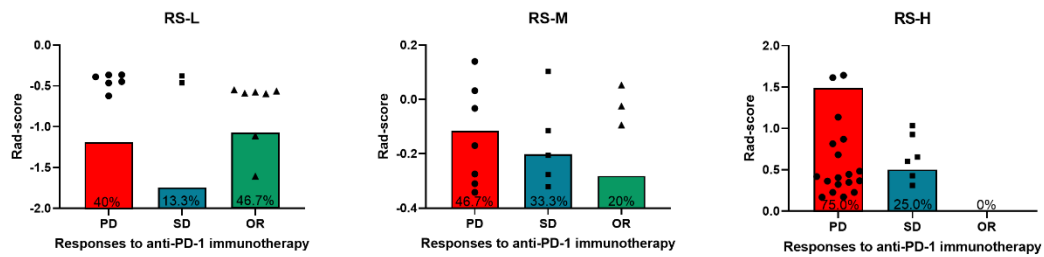

**Supplementary Fig. 13. Evaluation of the response to anti-PD-1 immunotherapy in subgroup analysis, according to the RS groups.** a: The Radiomics scores of patients and proportions of different responses to anti-PD-1 immunotherapy in patients who received immunotherapy as the first line treatment, b: the Radiomics scores of patients and proportions of different responses to anti-PD-1 immunotherapy in patients who received immunotherapy as the second or the third line treatment. RS-L: RS-Low group, RS-M: RS-Middle group, RS-H: RS-High group. Source data are provided as a Source Data file.

## Supplementary Tables

**Supplementary Table 1.** Characteristics of patients with GC in anti-PD-1 immunotherapy cohorts.

| Variables                                 | SMU cohort |      | GPHCM cohort |      |
|-------------------------------------------|------------|------|--------------|------|
|                                           | n = 88     |      | n = 33       |      |
|                                           | n          | %    | n            | %    |
| Gender                                    |            |      |              |      |
| Male                                      | 51         | 58   | 12           | 36.4 |
| Female                                    | 37         | 42   | 21           | 63.6 |
| Age (years), median (interquartile range) | 54 (46-65) |      | 60 (49-66)   |      |
| Stage                                     |            |      |              |      |
| II                                        | 5          | 5.7  | 0            | 0    |
| III                                       | 30         | 34.1 | 8            | 24.2 |
| IV                                        | 53         | 60.2 | 25           | 75.8 |
| Treatment line (Immunotherapy)            |            |      |              |      |
| First Line                                | 34         | 38.6 | 0            | 0    |
| Second line                               | 28         | 31.8 | 21           | 63.6 |
| Third line                                | 26         | 29.6 | 12           | 36.4 |
| Treatment response                        |            |      |              |      |
| CR                                        | 7          | 8.0  | 1            | 3.0  |
| PR                                        | 23         | 26.1 | 7            | 21.2 |
| SD                                        | 16         | 18.2 | 10           | 30.3 |
| PD                                        | 42         | 47.7 | 15           | 45.5 |

CR: complete response, PR: partial response, SD: stable disease, PD: progressive disease.

**Supplementary Table 2.** Clinical characteristics of patients according to the NLR status in the training cohort.

| Variables                 | Training cohort (n = 240) |          |          | <i>P</i>            |
|---------------------------|---------------------------|----------|----------|---------------------|
|                           | NLR-L(%)                  | NLR-M(%) | NLR-H(%) |                     |
| Gender                    |                           |          |          | 0.882 <sup>b</sup>  |
| Male                      | 49(61.2)                  | 52(65.0) | 50(62.5) |                     |
| Female                    | 31(38.8)                  | 28(35.0) | 30(37.5) |                     |
| Size                      |                           |          |          | 0.026 <sup>b</sup>  |
| ≥4cm                      | 32(40.0)                  | 39(48.8) | 49(61.2) |                     |
| <4cm                      | 48(60.0)                  | 41(51.2) | 31(38.8) |                     |
| Age                       |                           |          |          | 0.8 <sup>b</sup>    |
| ≥60                       | 31(38.8)                  | 34(52.5) | 35(43.8) |                     |
| <60                       | 49(61.2)                  | 46(57.5) | 45(56.2) |                     |
| Differentiation           |                           |          |          | 0.365 <sup>b</sup>  |
| Well                      | 11(13.8)                  | 9(11.3)  | 7(8.8)   |                     |
| Moderate                  | 25(31.2)                  | 18(22.5) | 17(21.2) |                     |
| Poor or undifferentiation | 44(55.0)                  | 53(66.3) | 56(70.0) |                     |
| Location                  |                           |          |          | 0.462 <sup>a</sup>  |
| Cardia                    | 15(18.8)                  | 16(20.0) | 19(23.8) |                     |
| Body                      | 15(18.8)                  | 14(17.5) | 18(22.4) |                     |
| Antrum                    | 45(56.2)                  | 48(60.0) | 36(45.0) |                     |
| Whole                     | 5(6.2)                    | 2(2.5)   | 7(8.8)   |                     |
| Lauren type               |                           |          |          | 0.727 <sup>b</sup>  |
| Intestinal type           | 39(48.8)                  | 37(46.2) | 34(42.5) |                     |
| Diffuse or mixed type     | 41(51.2)                  | 43(53.8) | 46(57.5) |                     |
| CEA                       |                           |          |          | 0.441 <sup>b</sup>  |
| Elevated                  | 6(7.5)                    | 9(11.2)  | 11(13.8) |                     |
| Normal                    | 74(92.5)                  | 71(88.8) | 69(86.2) |                     |
| CA19-9                    |                           |          |          | 0.022 <sup>b</sup>  |
| Elevated                  | 8(10.0)                   | 6(7.5)   | 17(21.2) |                     |
| Normal                    | 72(90)                    | 74(92.5) | 63(78.8) |                     |
| Depth of invasion         |                           |          |          | <0.001 <sup>a</sup> |
| T1                        | 31(38.8)                  | 22(27.4) | 2(2.5)   |                     |
| T2                        | 8(10.0)                   | 9(11.3)  | 4(5.0)   |                     |
| T3                        | 10(12.4)                  | 12(15.0) | 7(8.8)   |                     |
| T4a                       | 28(35.0)                  | 32(40.0) | 50(62.5) |                     |
| T4b                       | 3(3.8)                    | 5(6.3)   | 17(21.2) |                     |
| Lymph node metastasis     |                           |          |          | <0.001 <sup>a</sup> |
| N0                        | 50(62.4)                  | 42(52.4) | 18(22.4) |                     |
| N1                        | 11(13.8)                  | 17(21.3) | 16(20.0) |                     |
| N2                        | 7(8.8)                    | 6(7.5)   | 9(11.3)  |                     |
| N3a                       | 8(10.0)                   | 6(7.5)   | 21(26.3) |                     |
| N3b                       | 4(5.0)                    | 9(11.3)  | 16(20.0) |                     |
| Distant metastasis        |                           |          |          | 0.018 <sup>a</sup>  |
| Yes                       | 0(0)                      | 1(1.3)   | 6(7.5)   |                     |
| No                        | 80(100)                   | 79(98.7) | 74(92.5) |                     |
| TNM stage                 |                           |          |          | <0.001 <sup>a</sup> |
| I                         | 36(45.0)                  | 27(33.8) | 2(2.5)   |                     |

|     |          |          |          |
|-----|----------|----------|----------|
| II  | 19(23.8) | 19(23.8) | 20(25.0) |
| III | 25(31.2) | 33(41.2) | 52(65.0) |
| IV  | 0(0)     | 1(1.2)   | 6(7.5)   |

---

Variables are in n (%). <sup>a</sup>: *P* values are two-tailed from Fisher's exact test, <sup>b</sup>: *P* values are two-tailed from  $\chi^2$  test.

**Supplementary Table 3.** Clinical characteristics of patients according to the NLR status in the internal validation cohort 1.

| Variables                 | Internal validation cohort 1 (n = 158) |          |          | <i>P</i>            |
|---------------------------|----------------------------------------|----------|----------|---------------------|
|                           | NLR-L(%)                               | NLR-M(%) | NLR-H(%) |                     |
| Gender                    |                                        |          |          | 0.822 <sup>b</sup>  |
| Male                      | 38(67.9)                               | 31(72.1) | 43(72.9) |                     |
| Female                    | 18(32.1)                               | 12(27.9) | 16(27.1) |                     |
| Size                      |                                        |          |          | 0.005 <sup>b</sup>  |
| ≥4cm                      | 22(39.3)                               | 23(53.5) | 41(69.5) |                     |
| <4cm                      | 34(60.7)                               | 20(46.5) | 18(30.5) |                     |
| Age                       |                                        |          |          | 0.816 <sup>b</sup>  |
| ≥60                       | 18(32.1)                               | 14(32.6) | 22(37.3) |                     |
| <60                       | 38(67.9)                               | 29(67.4) | 37(62.7) |                     |
| Differentiation           |                                        |          |          | 0.746 <sup>a</sup>  |
| Well                      | 5(8.9)                                 | 1(4.7)   | 3(5.1)   |                     |
| Moderate                  | 16(28.6)                               | 14(32.5) | 14(23.7) |                     |
| Poor or undifferentiation | 35(62.5)                               | 27(62.8) | 42(71.2) |                     |
| Location                  |                                        |          |          | 0.425 <sup>a</sup>  |
| Cardia                    | 13(23.2)                               | 8(18.5)  | 17(28.8) |                     |
| Body                      | 7(12.5)                                | 7(16.3)  | 14(23.7) |                     |
| Antrum                    | 33(58.9)                               | 26(60.5) | 24(40.7) |                     |
| Whole                     | 3(5.4)                                 | 2(4.7)   | 4(6.8)   |                     |
| Lauren type               |                                        |          |          | 0.031 <sup>b</sup>  |
| Intestinal type           | 34(60.7)                               | 15(34.9) | 26(44.1) |                     |
| Diffuse or mixed type     | 22(39.3)                               | 28(65.1) | 33(55.9) |                     |
| CEA                       |                                        |          |          | 0.861 <sup>b</sup>  |
| Elevated                  | 6(10.7)                                | 6(14.0)  | 8(13.6)  |                     |
| Normal                    | 50(89.3)                               | 37(86.0) | 51(86.4) |                     |
| CA19-9                    |                                        |          |          | 0.228 <sup>a</sup>  |
| Elevated                  | 4(7.1)                                 | 7(16.3)  | 4(6.8)   |                     |
| Normal                    | 52(92.9)                               | 36(83.7) | 55(93.2) |                     |
| Depth of invasion         |                                        |          |          | <0.001 <sup>a</sup> |
| T1                        | 17(30.4)                               | 8(18.6)  | 2(3.4)   |                     |
| T2                        | 6(10.7)                                | 5(11.6)  | 3(5.1)   |                     |
| T3                        | 10(17.9)                               | 6(14.0)  | 3(5.1)   |                     |
| T4a                       | 18(32.1)                               | 15(34.9) | 35(59.3) |                     |
| T4b                       | 5(8.9)                                 | 9(20.9)  | 16(27.1) |                     |
| Lymph node metastasis     |                                        |          |          | <0.001 <sup>a</sup> |
| N0                        | 33(58.9)                               | 15(34.9) | 10(16.9) |                     |
| N1                        | 7(12.5)                                | 10(23.2) | 9(15.3)  |                     |
| N2                        | 12(21.5)                               | 6(14.0)  | 9(15.3)  |                     |
| N3a                       | 4(7.1)                                 | 7(16.3)  | 18(30.5) |                     |
| N3b                       | 0(0)                                   | 5(11.6)  | 13(22.0) |                     |
| Distant metastasis        |                                        |          |          | 0.389 <sup>a</sup>  |
| Yes                       | 1(1.8)                                 | 1(2.3)   | 4(6.8)   |                     |
| No                        | 55(98.2)                               | 42(97.7) | 55(93.2) |                     |
| TNM stage                 |                                        |          |          | <0.001 <sup>a</sup> |
| I                         | 21(37.5)                               | 10(23.3) | 3(5.1)   |                     |

|     |          |          |          |
|-----|----------|----------|----------|
| II  | 15(26.8) | 8(18.6)  | 7(11.9)  |
| III | 19(33.9) | 24(55.8) | 45(76.2) |
| IV  | 1(1.8)   | 1(2.3)   | 4(6.8)   |

---

Variables are in n (%). <sup>a</sup>: *P* values are two-tailed from Fisher's exact test, <sup>b</sup>: *P* values are two-tailed from  $\chi^2$  test.

**Supplementary Table 4.** Clinical characteristics of patients according to the NLR status in the external validation cohort 1.

| Variables                 | External validation cohort 1 (n = 92) |          |          | <i>P</i>           |
|---------------------------|---------------------------------------|----------|----------|--------------------|
|                           | NLR-L(%)                              | NLR-M(%) | NLR-H(%) |                    |
| Gender                    |                                       |          |          | 0.521 <sup>b</sup> |
| Male                      | 22(59.5)                              | 19(70.4) | 20(71.4) |                    |
| Female                    | 15(40.5)                              | 8(29.6)  | 8(28.6)  |                    |
| Size                      |                                       |          |          | 0.067 <sup>b</sup> |
| ≥4cm                      | 19(51.4)                              | 15(55.6) | 22(78.6) |                    |
| <4cm                      | 18(48.6)                              | 12(44.4) | 6(21.4)  |                    |
| Age                       |                                       |          |          | 0.326 <sup>b</sup> |
| ≥60                       | 18(48.6)                              | 10(37.0) | 16(57.1) |                    |
| <60                       | 19(51.4)                              | 17(63.0) | 12(42.9) |                    |
| Differentiation           |                                       |          |          | 0.905 <sup>a</sup> |
| Well                      | 1(2.7)                                | 0(0)     | 0(0)     |                    |
| Moderate                  | 7(18.9)                               | 7(25.9)  | 5(17.9)  |                    |
| Poor or undifferentiation | 29(78.4)                              | 20(74.1) | 23(82.1) |                    |
| Location                  |                                       |          |          | 0.550 <sup>a</sup> |
| Cardia                    | 10(27.0)                              | 10(37.0) | 9(32.1)  |                    |
| Body                      | 7(18.9)                               | 9(33.3)  | 7(25.0)  |                    |
| Antrum                    | 17(45.9)                              | 8(29.7)  | 10(35.8) |                    |
| Whole                     | 3(8.2)                                | 0(0)     | 2(7.1)   |                    |
| Lauren type               |                                       |          |          | 0.552 <sup>b</sup> |
| Intestinal type           | 14(37.8)                              | 7(25.9)  | 8(28.6)  |                    |
| Diffuse or mixed type     | 23(62.2)                              | 20(74.1) | 20(71.4) |                    |
| CEA                       |                                       |          |          | 0.476 <sup>a</sup> |
| Elevated                  | 5(13.5)                               | 4(14.8)  | 7(25.0)  |                    |
| Normal                    | 32(86.5)                              | 23(85.2) | 21(75.0) |                    |
| CA19-9                    |                                       |          |          | 0.394 <sup>a</sup> |
| Elevated                  | 4(10.8)                               | 5(18.5)  | 2(7.1)   |                    |
| Normal                    | 33(89.2)                              | 22(81.5) | 26(92.9) |                    |
| Depth of invasion         |                                       |          |          | 0.051 <sup>a</sup> |
| T1                        | 8(21.6)                               | 4(14.8)  | 2(7.1)   |                    |
| T2                        | 8(21.6)                               | 1(3.7)   | 1(3.6)   |                    |
| T3                        | 7(18.9)                               | 5(18.5)  | 9(32.1)  |                    |
| T4a                       | 11(29.8)                              | 16(59.3) | 11(39.3) |                    |
| T4b                       | 3(8.1)                                | 1(3.7)   | 5(17.9)  |                    |
| Lymph node metastasis     |                                       |          |          | 0.328 <sup>a</sup> |
| N0                        | 15(40.6)                              | 11(40.8) | 8(28.6)  |                    |
| N1                        | 7(18.9)                               | 4(14.8)  | 3(10.7)  |                    |
| N2                        | 5(13.5)                               | 3(11.1)  | 3(10.7)  |                    |
| N3a                       | 4(10.8)                               | 8(29.6)  | 7(25.0)  |                    |
| N3b                       | 6(16.2)                               | 1(3.7)   | 7(25.0)  |                    |
| Distant metastasis        |                                       |          |          | 0.202 <sup>a</sup> |
| Yes                       | 2(5.4)                                | 1(3.7)   | 5(17.9)  |                    |
| No                        | 35(94.6)                              | 26(96.3) | 23(82.1) |                    |
| TNM stage                 |                                       |          |          | 0.027 <sup>a</sup> |

|     |          |          |          |
|-----|----------|----------|----------|
| I   | 11(29.7) | 5(18.5)  | 3(10.7)  |
| II  | 11(29.7) | 8(29.6)  | 2(7.1)   |
| III | 13(35.1) | 13(48.2) | 18(64.3) |
| IV  | 2(5.5)   | 1(3.7)   | 5(17.9)  |

---

Variables are in n (%), <sup>a</sup>: *P* values are two-tailed from Fisher's exact test, <sup>b</sup>: *P* values are two-tailed from  $\chi^2$  test.

**Supplementary Table 5.** Clinical characteristics of patients according to the RS in the training cohort.

| Variables                 | Training cohort (n = 240) |          |          | <i>P</i>            |
|---------------------------|---------------------------|----------|----------|---------------------|
|                           | RS-L(%)                   | RS-M(%)  | RS-H(%)  |                     |
| Gender                    |                           |          |          | 0.024 <sup>b</sup>  |
| Male                      | 41(51.2)                  | 57(71.3) | 53(66.2) |                     |
| Female                    | 39(48.8)                  | 23(28.7) | 27(33.8) |                     |
| Size                      |                           |          |          | <0.001 <sup>b</sup> |
| ≥4cm                      | 28(35.0)                  | 38(47.5) | 54(67.5) |                     |
| <4cm                      | 52(65.0)                  | 42(52.5) | 26(32.5) |                     |
| Age                       |                           |          |          | 0.154 <sup>b</sup>  |
| ≥60                       | 27(33.8)                  | 34(42.5) | 39(48.8) |                     |
| <60                       | 53(66.2)                  | 46(57.5) | 41(51.2) |                     |
| Differentiation           |                           |          |          | 0.044 <sup>b</sup>  |
| Well                      | 14(17.5)                  | 11(13.8) | 2(2.5)   |                     |
| Moderate                  | 18(22.5)                  | 20(25.0) | 22(27.5) |                     |
| Poor or undifferentiation | 48(60.0)                  | 49(61.2) | 56(70.0) |                     |
| Location                  |                           |          |          | 0.395 <sup>a</sup>  |
| Cardia                    | 11(13.8)                  | 20(25.0) | 19(23.8) |                     |
| Body                      | 19(23.8)                  | 15(18.8) | 13(16.2) |                     |
| Antrum                    | 46(57.4)                  | 42(52.4) | 41(51.2) |                     |
| Whole                     | 4(5.0)                    | 3(3.8)   | 7(8.8)   |                     |
| Lauren type               |                           |          |          | 0.439 <sup>b</sup>  |
| Intestinal type           | 41(51.2)                  | 36(45.0) | 33(41.3) |                     |
| Diffuse or mixed type     | 39(48.8)                  | 44(55.0) | 47(58.7) |                     |
| CEA                       |                           |          |          | 0.203 <sup>b</sup>  |
| Elevated                  | 5(6.3)                    | 9(11.3)  | 12(15.0) |                     |
| Normal                    | 75(93.7)                  | 71(88.7) | 68(85.0) |                     |
| CA19-9                    |                           |          |          | 0.004 <sup>b</sup>  |
| Elevated                  | 4(5.0)                    | 9(11.3)  | 18(22.5) |                     |
| Normal                    | 76(95.0)                  | 71(88.7) | 62(77.5) |                     |
| Depth of invasion         |                           |          |          | <0.001 <sup>a</sup> |
| T1                        | 41(51.1)                  | 13(16.2) | 1(1.2)   |                     |
| T2                        | 7(8.8)                    | 7(8.8)   | 7(8.8)   |                     |
| T3                        | 11(13.8)                  | 10(12.5) | 8(10.0)  |                     |
| T4a                       | 18(22.5)                  | 44(55.0) | 48(60.0) |                     |
| T4b                       | 3(3.8)                    | 6(7.5)   | 16(20.0) |                     |
| Lymph node metastasis     |                           |          |          | <0.001 <sup>a</sup> |
| N0                        | 56(70.0)                  | 39(48.8) | 15(18.8) |                     |
| N1                        | 10(12.4)                  | 12(15.0) | 22(27.4) |                     |
| N2                        | 3(3.8)                    | 8(10.0)  | 11(13.8) |                     |
| N3a                       | 7(8.8)                    | 12(15.0) | 16(20.0) |                     |
| N3b                       | 4(5.0)                    | 9(11.2)  | 16(20.0) |                     |
| Distant metastasis        |                           |          |          | 0.073 <sup>a</sup>  |
| Yes                       | 0(0)                      | 2(2.5)   | 5(6.3)   |                     |
| No                        | 80(100)                   | 78(97.5) | 75(93.7) |                     |
| TNM stage                 |                           |          |          | <0.001 <sup>a</sup> |
| I                         | 44(55.0)                  | 16(20.0) | 5(6.3)   |                     |

|     |          |          |          |
|-----|----------|----------|----------|
| II  | 17(21.3) | 26(32.5) | 15(18.7) |
| III | 19(23.7) | 36(45.0) | 55(68.7) |
| IV  | 0(0)     | 2(2.5)   | 5(6.3)   |

---

Variables are in n (%), <sup>a</sup>: *P* values are two-tailed from Fisher's exact test, <sup>b</sup>: *P* values are two-tailed from  $\chi^2$  test.

**Supplementary Table 6.** Clinical characteristics of patients according to the RS in the internal validation cohort 1.

| Variables                 | Internal validation cohort 1 (n = 158) |          |          | P                   |
|---------------------------|----------------------------------------|----------|----------|---------------------|
|                           | RS-L(%)                                | RS-M(%)  | RS-H(%)  |                     |
| Gender                    |                                        |          |          | 0.261 <sup>b</sup>  |
| Male                      | 25(69.4)                               | 38(64.4) | 49(77.8) |                     |
| Female                    | 11(30.6)                               | 21(35.6) | 14(22.2) |                     |
| Size                      |                                        |          |          | <0.001 <sup>b</sup> |
| ≥4cm                      | 11(30.6)                               | 28(47.5) | 47(74.6) |                     |
| <4cm                      | 25(69.4)                               | 31(52.5) | 16(25.4) |                     |
| Age                       |                                        |          |          | 0.53 <sup>b</sup>   |
| ≥60                       | 15(41.7)                               | 18(30.5) | 21(33.3) |                     |
| <60                       | 21(58.3)                               | 41(69.5) | 42(66.7) |                     |
| Differentiation           |                                        |          |          | 0.711 <sup>a</sup>  |
| Well                      | 4(11.1)                                | 3(5.1)   | 3(4.8)   |                     |
| Moderate                  | 8(22.2)                                | 17(28.8) | 19(30.1) |                     |
| Poor or undifferentiation | 24(66.7)                               | 39(66.1) | 41(65.1) |                     |
| Location                  |                                        |          |          | 0.537 <sup>a</sup>  |
| Cardia                    | 5(13.9)                                | 13(22.0) | 20(31.8) |                     |
| Body                      | 6(16.6)                                | 11(18.7) | 11(17.5) |                     |
| Antrum                    | 23(63.9)                               | 32(54.2) | 28(44.4) |                     |
| Whole                     | 2(5.6)                                 | 3(5.1)   | 4(6.3)   |                     |
| Lauren type               |                                        |          |          | 0.28 <sup>b</sup>   |
| Intestinal type           | 19(52.8)                               | 31(52.5) | 25(39.7) |                     |
| Diffuse or mixed type     | 17(47.2)                               | 28(47.5) | 38(60.3) |                     |
| CEA                       |                                        |          |          | 0.097 <sup>a</sup>  |
| Elevated                  | 1(2.8)                                 | 10(16.9) | 9(14.3)  |                     |
| Normal                    | 35(97.2)                               | 49(83.1) | 54(85.7) |                     |
| CA19-9                    |                                        |          |          | 0.542 <sup>a</sup>  |
| Elevated                  | 2(5.6)                                 | 5(8.5)   | 8(12.7)  |                     |
| Normal                    | 34(94.4)                               | 54(91.5) | 55(87.3) |                     |
| Depth of invasion         |                                        |          |          | 0.006 <sup>a</sup>  |
| T1                        | 12(33.3)                               | 11(18.6) | 4(6.3)   |                     |
| T2                        | 4(11.1)                                | 7(11.9)  | 3(4.8)   |                     |
| T3                        | 6(16.7)                                | 6(10.2)  | 7(11.1)  |                     |
| T4a                       | 12(33.3)                               | 25(42.4) | 31(49.2) |                     |
| T4b                       | 2(5.6)                                 | 10(16.9) | 18(28.6) |                     |
| Lymph node metastasis     |                                        |          |          | 0.001 <sup>a</sup>  |
| N0                        | 21(58.4)                               | 24(40.7) | 13(20.6) |                     |
| N1                        | 8(22.2)                                | 9(15.3)  | 9(14.3)  |                     |
| N2                        | 4(11.1)                                | 12(20.2) | 11(17.5) |                     |
| N3a                       | 3(8.3)                                 | 7(11.9)  | 19(30.2) |                     |
| N3b                       | 0(0)                                   | 7(11.9)  | 11(17.4) |                     |
| Distant metastasis        |                                        |          |          | 0.150 <sup>a</sup>  |
| Yes                       | 0(0)                                   | 1(1.7)   | 5(7.9)   |                     |
| No                        | 36(100)                                | 58(98.3) | 58(92.1) |                     |
| TNM stage                 |                                        |          |          | <0.001 <sup>a</sup> |
| I                         | 13(36.1)                               | 17(28.8) | 4(6.3)   |                     |

|     |          |          |          |
|-----|----------|----------|----------|
| II  | 12(33.3) | 9(15.3)  | 9(14.3)  |
| III | 11(30.6) | 32(54.2) | 45(71.4) |
| IV  | 0(0)     | 1(1.7)   | 5(8.0)   |

---

Variables are in n (%), <sup>a</sup>: *P* values are two-tailed from Fisher's exact test, <sup>b</sup>: *P* values are two-tailed from  $\chi^2$  test.

**Supplementary Table 7.** Clinical characteristics of patients according to the RS in the internal validation cohort 2.

| Variables                 | Internal validation cohort 2 (n = 522) |           |           | P                   |
|---------------------------|----------------------------------------|-----------|-----------|---------------------|
|                           | RS-L(%)                                | RS-M(%)   | RS-H(%)   |                     |
| Gender                    |                                        |           |           | 0.076 <sup>b</sup>  |
| Male                      | 95(64.6)                               | 119(66.5) | 147(75.0) |                     |
| Female                    | 52(35.4)                               | 60(33.5)  | 49(25.0)  |                     |
| Size                      |                                        |           |           | 0.19 <sup>b</sup>   |
| ≥4cm                      | 41(27.9)                               | 59(33.0)  | 73(37.2)  |                     |
| <4cm                      | 106(72.1)                              | 120(67.0) | 123(62.8) |                     |
| Age                       |                                        |           |           | 0.36 <sup>b</sup>   |
| ≥60                       | 52(35.4)                               | 77(43.0)  | 80(40.8)  |                     |
| <60                       | 95(64.6)                               | 102(57.0) | 116(59.2) |                     |
| Differentiation           |                                        |           |           | 0.99 <sup>b</sup>   |
| Well                      | 27(18.4)                               | 29(16.2)  | 33(16.8)  |                     |
| Moderate                  | 33(22.4)                               | 40(22.3)  | 44(22.4)  |                     |
| Poor or undifferentiation | 87(59.2)                               | 110(61.5) | 119(60.8) |                     |
| Location                  |                                        |           |           | 0.004 <sup>b</sup>  |
| Cardia                    | 17(11.6)                               | 30(16.8)  | 20(10.2)  |                     |
| Body                      | 29(19.7)                               | 29(16.2)  | 37(18.9)  |                     |
| Antrum                    | 95(64.6)                               | 111(62.0) | 111(56.6) |                     |
| Whole                     | 6(4.1)                                 | 9(5.0)    | 28(14.3)  |                     |
| Lauren type               |                                        |           |           | 0.275 <sup>b</sup>  |
| Intestinal type           | 72(49.0)                               | 84(46.9)  | 80(40.8)  |                     |
| Diffuse or mixed type     | 75(51.0)                               | 95(53.1)  | 116(59.2) |                     |
| CEA                       |                                        |           |           | 0.03 <sup>b</sup>   |
| Elevated                  | 9(6.1)                                 | 17(9.5)   | 29(14.8)  |                     |
| Normal                    | 138(93.9)                              | 162(90.5) | 167(85.2) |                     |
| CA19-9                    |                                        |           |           | 0.129 <sup>b</sup>  |
| Elevated                  | 17(11.6)                               | 34(19.0)  | 37(18.9)  |                     |
| Normal                    | 130(88.4)                              | 145(81.0) | 159(81.1) |                     |
| Depth of invasion         |                                        |           |           | <0.001 <sup>a</sup> |
| T1                        | 52(35.4)                               | 45(25.1)  | 47(24.0)  |                     |
| T2                        | 32(21.8)                               | 35(19.5)  | 14(7.1)   |                     |
| T3                        | 6(4.0)                                 | 6(3.4)    | 3(1.5)    |                     |
| T4a                       | 42(28.6)                               | 63(35.2)  | 60(30.6)  |                     |
| T4b                       | 15(10.2)                               | 30(16.8)  | 72(36.8)  |                     |
| Lymph node metastasis     |                                        |           |           | 0.02 <sup>b</sup>   |
| N0                        | 82(55.8)                               | 75(41.9)  | 88(44.9)  |                     |
| N1                        | 34(23.1)                               | 49(27.4)  | 35(17.9)  |                     |
| N2                        | 14(9.5)                                | 23(12.8)  | 25(12.8)  |                     |
| N3a                       | 10(6.8)                                | 26(14.5)  | 34(17.3)  |                     |
| N3b                       | 7(4.8)                                 | 6(3.4)    | 14(7.1)   |                     |
| Distant metastasis        |                                        |           |           | 0.005 <sup>b</sup>  |
| Yes                       | 9(6.1)                                 | 10(5.6)   | 28(14.3)  |                     |
| No                        | 138(93.9)                              | 169(94.4) | 168(85.7) |                     |
| TNM stage                 |                                        |           |           | <0.001 <sup>b</sup> |

|     |          |          |          |
|-----|----------|----------|----------|
| I   | 53(36.1) | 39(21.8) | 37(18.8) |
| II  | 38(25.9) | 50(27.9) | 36(18.4) |
| III | 47(32.0) | 80(44.7) | 95(48.5) |
| IV  | 9(6.0)   | 10(5.6)  | 28(14.3) |

---

Variables are in n (%). <sup>a</sup>: *P* values are two-tailed from Fisher's exact test, <sup>b</sup>: *P* values are two-tailed from  $\chi^2$  test.

**Supplementary Table 8.** Clinical characteristics of patients according to the RS in the external validation cohort.

| Variables                 | External validation cohort (n = 1231) |           |           | P                   |
|---------------------------|---------------------------------------|-----------|-----------|---------------------|
|                           | RS-L(%)                               | RS-M(%)   | RS-H(%)   |                     |
| Gender                    |                                       |           |           | <0.001 <sup>b</sup> |
| Male                      | 234(63.6)                             | 255(65.2) | 357(75.6) |                     |
| Female                    | 134(36.4)                             | 136(34.8) | 115(24.4) |                     |
| Size                      |                                       |           |           | <0.001 <sup>b</sup> |
| ≥4cm                      | 154(41.8)                             | 240(61.4) | 357(75.6) |                     |
| <4cm                      | 214(58.2)                             | 151(38.6) | 115(24.4) |                     |
| Age                       |                                       |           |           | 0.212 <sup>b</sup>  |
| ≥60                       | 150(40.8)                             | 162(41.4) | 218(46.2) |                     |
| <60                       | 218(59.2)                             | 229(58.6) | 254(53.8) |                     |
| Differentiation           |                                       |           |           | 0.004 <sup>a</sup>  |
| Well                      | 13(3.5)                               | 1(0.3)    | 6(1.3)    |                     |
| Moderate                  | 48(13.0)                              | 66(16.9)  | 81(17.1)  |                     |
| Poor or undifferentiation | 307(83.5)                             | 324(82.8) | 385(81.6) |                     |
| Location                  |                                       |           |           | <0.001 <sup>b</sup> |
| Cardia                    | 93(25.3)                              | 129(33.0) | 197(41.7) |                     |
| Body                      | 72(19.6)                              | 87(22.3)  | 90(19.1)  |                     |
| Antrum                    | 199(54.1)                             | 158(40.4) | 146(30.9) |                     |
| Whole                     | 4(1.0)                                | 17(4.3)   | 39(8.3)   |                     |
| Lauren type               |                                       |           |           | 0.849 <sup>b</sup>  |
| Intestinal type           | 125(34.0)                             | 138(35.3) | 158(33.5) |                     |
| Diffuse or mixed type     | 243(66.0)                             | 253(64.7) | 314(66.5) |                     |
| CEA                       |                                       |           |           | <0.001 <sup>b</sup> |
| Elevated                  | 49(13.3)                              | 77(19.7)  | 118(25.0) |                     |
| Normal                    | 319(86.7)                             | 314(80.3) | 354(75.0) |                     |
| CA19-9                    |                                       |           |           | <0.001 <sup>b</sup> |
| Elevated                  | 41(11.1)                              | 64(16.4)  | 137(29.0) |                     |
| Normal                    | 327(88.9)                             | 327(83.6) | 335(71.0) |                     |
| Depth of invasion         |                                       |           |           | <0.001 <sup>b</sup> |
| T1                        | 89(24.2)                              | 41(10.5)  | 26(5.5)   |                     |
| T2                        | 60(16.3)                              | 56(14.3)  | 21(4.5)   |                     |
| T3                        | 83(22.6)                              | 102(26.1) | 86(18.2)  |                     |
| T4a                       | 120(32.6)                             | 168(43.0) | 280(59.3) |                     |
| T4b                       | 16(4.3)                               | 24(6.1)   | 59(12.5)  |                     |
| Lymph node metastasis     |                                       |           |           | <0.001 <sup>b</sup> |
| N0                        | 166(45.1)                             | 137(35.0) | 103(21.8) |                     |
| N1                        | 59(16.0)                              | 70(17.9)  | 70(14.8)  |                     |
| N2                        | 58(15.8)                              | 57(14.6)  | 98(20.8)  |                     |
| N3a                       | 56(15.2)                              | 89(22.8)  | 120(25.4) |                     |
| N3b                       | 29(7.9)                               | 38(9.7)   | 81(17.2)  |                     |
| Distant metastasis        |                                       |           |           | <0.001 <sup>b</sup> |
| Yes                       | 24(6.5)                               | 33(8.4)   | 84(17.8)  |                     |
| No                        | 344(93.5)                             | 358(91.6) | 388(82.2) |                     |
| TNM stage                 |                                       |           |           | <0.001 <sup>b</sup> |
| I                         | 113(30.7)                             | 65(16.6)  | 38(8.1)   |                     |

|     |           |           |           |
|-----|-----------|-----------|-----------|
| II  | 114(31.0) | 117(29.9) | 79(16.7)  |
| III | 117(31.8) | 176(45.1) | 271(57.4) |
| IV  | 24(6.5)   | 33(8.4)   | 84(17.8)  |

---

Variables are in n (%). <sup>a</sup>: *P* values are two-tailed from Fisher's exact test, <sup>b</sup>: *P* values are two-tailed from  $\chi^2$  test.

**Supplementary Table 9.** Clinical characteristics of patients according to the RS in the immunotherapy cohorts.

| Variables                      | SMU and GPHCM cohorts (n = 121) |          |          | <i>P</i>            |
|--------------------------------|---------------------------------|----------|----------|---------------------|
|                                | RS-L(%)                         | RS-M(%)  | RS-H(%)  |                     |
| Gender                         |                                 |          |          | 0.525 <sup>b</sup>  |
| Male                           | 16(53.3)                        | 18(45.0) | 29(56.9) |                     |
| Female                         | 14(46.7)                        | 22(55.0) | 22(43.1) |                     |
| Age                            |                                 |          |          | 0.799 <sup>b</sup>  |
| ≥60                            | 11(36.7)                        | 15(37.5) | 22(43.1) |                     |
| <60                            | 19(63.3)                        | 25(62.5) | 29(56.9) |                     |
| TNM stage                      |                                 |          |          | 0.625 <sup>a</sup>  |
| II                             | 1(3.3)                          | 2(5.0)   | 2(3.9)   |                     |
| III                            | 9(30.0)                         | 16(40.0) | 13(25.5) |                     |
| IV                             | 20(66.7)                        | 22(55.0) | 36(70.6) |                     |
| Treatment line (Immunotherapy) |                                 |          |          | 0.949 <sup>b</sup>  |
| First Line                     | 8(26.7)                         | 13(32.5) | 13(25.5) |                     |
| Second line                    | 12(40.0)                        | 16(40.0) | 21(41.2) |                     |
| Third line                     | 10(33.3)                        | 11(27.5) | 17(33.3) |                     |
| Treatment response             |                                 |          |          | <0.001 <sup>b</sup> |
| OR                             | 17(56.7)                        | 16(40.0) | 5(9.8)   |                     |
| SD                             | 4(13.3)                         | 11(27.5) | 11(21.6) |                     |
| PD                             | 9(30.0)                         | 13(32.5) | 35(68.6) |                     |

OR: objective response, SD: stable disease, PD: progressive disease, variables are in n (%), <sup>a</sup>: *P* values are two-tailed from Fisher's exact test, <sup>b</sup>: *P* values are two-tailed from  $\chi^2$  test.

**Supplementary Table 10.** AUCs of the RS and the selected features in predicting NLR status in the training cohort, internal validation cohort 1, and external validation cohort 1.

| Variables                        | Training cohort     |          | Internal validation cohort 1 |          | External validation cohort 1 |          |
|----------------------------------|---------------------|----------|------------------------------|----------|------------------------------|----------|
|                                  | AUC (95%CI)         | <i>P</i> | AUC (95%CI)                  | <i>P</i> | AUC (95%CI)                  | <i>P</i> |
| RS                               | 0.861 (0.807-0.915) | <0.001   | 0.799 (0.721-0.878)          | <0.001   | 0.807 (0.702-0.912)          | <0.001   |
| peri-GLSZM_ZSV                   | 0.471 (0.381-0.560) | 0.521    | 0.423 (0.318-0.529)          | 0.157    | 0.495 (0.349-0.641)          | 0.944    |
| peri-GLRLM_RLV                   | 0.523 (0.433-0.614) | 0.61     | 0.479 (0.373-0.585)          | 0.697    | 0.560 (0.408-0.712)          | 0.42     |
| peri-NGTDM_Busyness              | 0.717 (0.639-0.796) | <0.001   | 0.727 (0.636-0.819)          | <0.001   | 0.643 (0.495-0.791)          | 0.054    |
| intro-NGTDM_Busyness_1.0         | 0.734 (0.657-0.811) | <0.001   | 0.730 (0.639-0.822)          | <0.001   | 0.684 (0.548-0.820)          | 0.013    |
| intro-NGTDM_Strength_1.0         | 0.199 (0.133-0.265) | <0.001   | 0.216 (0.134-0.298)          | <0.001   | 0.253 (0.131-0.375)          | 0.001    |
| peri-GLRLM_LRHGE_2.5             | 0.626 (0.540-0.712) | 0.006    | 0.549 (0.444-0.655)          | 0.362    | 0.638 (0.500-0.775)          | 0.064    |
| intro-GLCM_ClusterProminence_1.0 | 0.292 (0.213-0.372) | <0.001   | 0.314 (0.216-0.411)          | 0.001    | 0.311 (0.178-0.444)          | 0.011    |
| peri-GLCM_Correlation_1.0        | 0.707 (0.626-0.789) | <0.001   | 0.616 (0.511-0.720)          | 0.033    | 0.622 (0.481-0.763)          | 0.101    |
| intro-GLRLM_GLN                  | 0.649 (0.564-0.733) | 0.001    | 0.638 (0.536-0.740)          | 0.011    | 0.667 (0.530-0.804)          | 0.025    |
| peri-perimeter                   | 0.787 (0.717-0.857) | <0.001   | 0.774 (0.691-0.858)          | <0.001   | 0.720 (0.594-0.845)          | 0.003    |

RS: Radiomics score, *P* values are two-sided from Delong's test.

**Supplementary Table 11.** Univariate association of RS, clinicopathological characteristics with disease-free and overall survival in the training cohort.

| Variables                    | Disease-free survival |          | Overall survival     |          |
|------------------------------|-----------------------|----------|----------------------|----------|
|                              | HR (95%CI)            | <i>P</i> | HR (95%CI)           | <i>P</i> |
| RS                           | 3.394 (2.496-4.615)   | <0.0001  | 3.034 (2.200-4.182)  | <0.0001  |
| Age (years) (≥60 vs. <60)    | 1.018 (0.691-1.500)   | 0.928    | 0.974 (0.627-1.512)  | 0.906    |
| Gender (Male vs. female)     | 1.085 (0.731-1.611)   | 0.686    | 1.374 (0.867-2.178)  | 0.176    |
| Tumor size (>4 cm vs. ≤4 cm) | 1.840 (1.247-2.717)   | 0.002    | 1.872 (1.202-2.916)  | 0.006    |
| Tumor location               | 1.041 (0.834-1.300)   | 0.722    | 1.044 (0.813-1.341)  | 0.734    |
| Differentiation              | 1.476 (1.078-2.022)   | 0.015    | 1.571 (1.091-2.262)  | 0.015    |
| Lauren type                  | 1.287 (0.874-1.895)   | 0.202    | 1.313(0.846-2.036)   | 0.224    |
| CEA (Elevated vs. normal)    | 1.999 (1.188-3.362)   | 0.009    | 2.590 (1.498-4.476)  | 0.001    |
| CA19-9 (Elevated vs. normal) | 1.550 (0.922-2.606)   | 0.098    | 1.264 (0.685-2.331)  | 0.454    |
| Depth of invasion            | 1.723 (1.478-2.009)   | <0.0001  | 1.757 (1.470-2.100)  | <0.0001  |
| Lymph node metastasis        | 1.585 (1.401-1.793)   | <0.0001  | 1.645 (1.430-1.893)  | <0.0001  |
| Distant metastasis           | 6.626 (4.065-10.800)  | <0.0001  | 4.725 (1.882-11.864) | <0.0001  |

RS: Radiomics score, HR: hazard ratio, *P* values reported are two-tailed from Cox proportional hazard regression analyses.

**Supplementary Table 12.** Univariate association of RS, clinicopathological characteristics with disease-free and overall survival in the internal validation cohort 1.

| Variables                             | Disease-free survival |          | Overall survival    |          |
|---------------------------------------|-----------------------|----------|---------------------|----------|
|                                       | HR (95% CI)           | <i>P</i> | HR (95% CI)         | <i>P</i> |
| RS                                    | 3.235 (2.195-4.768)   | <0.0001  | 3.027 (2.033-4.508) | <0.0001  |
| Age (years) ( $\geq 60$ vs. $<60$ )   | 0.969 (0.616-1.523)   | 0.891    | 1.123 (0.700-1.801) | 0.631    |
| Gender (Male vs. female)              | 1.254 (0.772-2.039)   | 0.361    | 1.228 (0.729-2.067) | 0.44     |
| Tumor size ( $>4$ cm vs. $\leq 4$ cm) | 2.464 (1.557-3.899)   | <0.0001  | 2.242 (1.385-3.631) | 0.001    |
| Tumor location                        | 0.836 (0.665-1.052)   | 0.127    | 0.832 (0.651-1.064) | 0.142    |
| Differentiation                       | 1.127 (0.778-1.631)   | 0.527    | 1.040 (0.710-1.522) | 0.841    |
| Lauren type                           | 1.063 (0.694-1.627)   | 0.78     | 0.988 (0.628-1.554) | 0.957    |
| CEA (Elevated vs. normal)             | 1.729 (0.973-3.073)   | 0.062    | 1.695 (0.913-3.146) | 0.095    |
| CA19-9(Elevated vs. normal)           | 1.639 (0.867-3.100)   | 0.128    | 1.876 (0.986-3.571) | 0.055    |
| Depth of invasion                     | 1.654 (1.392-1.966)   | <0.0001  | 1.652 (1.377-1.981) | <0.0001  |
| Lymph node metastasis                 | 1.850 (1.568-2.182)   | <0.0001  | 1.741 (1.465-2.068) | <0.0001  |
| Distant metastasis                    | 6.961 (2.876-16.847)  | <0.0001  | 3.256 (1.290-8.215) | 0.012    |

RS: Radiomics score, HR: hazard ratio, *P* values reported are two-tailed from Cox proportional hazard regression analyses.

**Supplementary Table 13.** Univariate association of RS, clinicopathological characteristics with disease-free and overall survival in the internal validation cohort 2.

| Variables                             | Disease-free survival |          | Overall survival    |          |
|---------------------------------------|-----------------------|----------|---------------------|----------|
|                                       | HR (95% CI)           | <i>p</i> | HR (95% CI)         | <i>p</i> |
| RS                                    | 1.694 (1.440-1.993)   | <0.0001  | 1.767 (1.479-2.110) | <0.0001  |
| Age (years) ( $\geq 60$ vs. $<60$ )   | 1.091 (0.862-1.382)   | 0.47     | 1.301 (1.002-1.689) | 0.048    |
| Gender (Male vs. female)              | 0.885 (0.692-1.131)   | 0.328    | 0.903 (0.686-1.190) | 0.469    |
| Tumor size ( $>4$ cm vs. $\leq 4$ cm) | 1.182 (0.928-1.504)   | 0.176    | 1.243 (0.951-1.625) | 0.111    |
| Tumor location                        | 1.080 (0.925-1.262)   | 0.328    | 1.081 (0.911-1.283) | 0.374    |
| Differentiation                       | 1.189 (1.017-1.390)   | 0.03     | 1.322 (1.101-1.588) | 0.003    |
| Lauren type                           | 1.202 (0.951-1.520)   | 0.124    | 1.102 (0.848-1.430) | 0.468    |
| CEA (Elevated vs. normal)             | 2.512 (1.822-3.463)   | <0.0001  | 2.648 (1.855-3.778) | <0.0001  |
| CA19-9 (Elevated vs. normal)          | 2.635 (2.005-3.463)   | <0.0001  | 2.530 (1.864-3.435) | <0.0001  |
| Depth of invasion                     | 1.514 (1.411-1.624)   | <0.0001  | 1.538 (1.420-1.667) | <0.0001  |
| Lymph node metastasis                 | 1.357 (1.241-1.484)   | <0.0001  | 1.383 (1.253-1.526) | <0.0001  |
| Distant metastasis                    | 4.876 (3.506-6.780)   | <0.0001  | 4.148 (2.910-5.911) | <0.0001  |

RS: Radiomics score, HR: hazard ratio, *P* values reported are two-tailed from Cox proportional hazard regression analyses.

**Supplementary Table 14.** Univariate association of RS, clinicopathological characteristics with disease-free and overall survival in the external validation cohort.

| Variables                             | Disease-free survival |          | Overall survival    |          |
|---------------------------------------|-----------------------|----------|---------------------|----------|
|                                       | HR (95%CI)            | <i>p</i> | HR (95%CI)          | <i>p</i> |
| RS                                    | 1.860 (1.626-2.128)   | <0.0001  | 1.883 (1.646-2.153) | <0.0001  |
| Age (years) ( $\geq 60$ vs. $<60$ )   | 1.366 (1.124-1.660)   | 0.002    | 1.347 (1.108-1.639) | 0.003    |
| Gender (Male vs. female)              | 1.094 (0.884-1.355)   | 0.391    | 1.079 (0.871-1.336) | 0.485    |
| Tumor size ( $>4$ cm vs. $\leq 4$ cm) | 2.020 (1.624-2.514)   | <0.0001  | 1.080 (1.668-2.594) | <0.0001  |
| Tumor location                        | 0.883 (0.795-0.981)   | 0.02     | 0.889 (0.800-0.987) | 0.027    |
| Differentiation                       | 1.275 (1.001-1.624)   | 0.049    | 1.297 (1.016-1.655) | 0.037    |
| Lauren type                           | 1.480 (1.191-1.841)   | 0.001    | 1.512 (1.214-1.883) | <0.001   |
| CEA (Elevated vs. normal)             | 1.762 (1.417-2.190)   | <0.001   | 1.771 (1.424-2.203) | <0.001   |
| CA199 (Elevated vs. normal)           | 2.440 (1.980-3.006)   | <0.0001  | 2.440 (1.980-3.008) | <0.0001  |
| Depth of invasion                     | 1.613 (1.489-1.747)   | <0.0001  | 1.625 (1.499-1.763) | <0.0001  |
| Lymph node metastasis                 | 1.661 (1.545-1.786)   | <0.0001  | 1.676 (1.558-1.802) | <0.0001  |
| Distant metastasis                    | 4.073 (3.219-5.154)   | <0.0001  | 4.265 (3.367-5.403) | <0.0001  |

RS: Radiomics score, HR: hazard ratio, *P* values reported are two-tailed from Cox proportional hazard regression analyses.

**Supplementary Table 15.** Comparing the prediction power of the integrated nomogram with RS and TNM stage in the training and validation cohorts.

| Variable                     | Disease-free survival | Overall survival    |
|------------------------------|-----------------------|---------------------|
|                              | C-Index (95% CI)      | C-Index (95% CI)    |
| Training cohort              |                       |                     |
| Nomogram                     | 0.784 (0.745-0.823)   | 0.791 (0.749-0.834) |
| RS                           | 0.716 (0.675-0.757)   | 0.736 (0.689-0.783) |
| TNM Stage                    | 0.726 (0.687-0.765)   | 0.721 (0.678-0.764) |
| Internal Validation cohort 1 |                       |                     |
| Nomogram                     | 0.779 (0.730-0.828)   | 0.766 (0.713-0.819) |
| RS                           | 0.676 (0.623-0.729)   | 0.670 (0.613-0.727) |
| TNM Stage                    | 0.715 (0.690-0.740)   | 0.717 (0.689-0.744) |
| Internal Validation cohort 2 |                       |                     |
| Nomogram                     | 0.756 (0.731-0.781)   | 0.750 (0.720-0.780) |
| RS                           | 0.620 (0.587-0.653)   | 0.630 (0.595-0.665) |
| TNM Stage                    | 0.715 (0.690-0.740)   | 0.718 (0.689-0.747) |
| External Validation cohort   |                       |                     |
| Nomogram                     | 0.762 (0.742-0.782)   | 0.748 (0.726-0.770) |
| RS                           | 0.636 (0.609-0.663)   | 0.638 (0.611-0.665) |
| TNM Stage                    | 0.729 (0.709-0.749)   | 0.732 (0.712-0.752) |

RS: Radiomics score.

**Supplementary Table 16.** Antibody sources and staining conditions.

| Marker<br>s | Main target               | Antibody source          | Species              | Dilution | DAB<br>dyeing<br>time | Antigen Retrieval                             | Cellular<br>localization |
|-------------|---------------------------|--------------------------|----------------------|----------|-----------------------|-----------------------------------------------|--------------------------|
| CD8         | Cytotoxic T<br>lymphocyte | NeoMarker, clone<br>SP16 | Rabbit<br>monoclonal | 1:200    | 1.5 min               | Citrate buffer (pH<br>6.0) microwave<br>20min | Membranous               |
| CD66b       | Neutrophil                | BD Pharmingen            | Mouse<br>monoclonal  | 1:200    | 1.0 min               | Citrate buffer (pH<br>6.0) microwave<br>20min | Membranous               |

min: minute; sec: second. DAB: diaminobenzidine.

**Supplementary Table 17.** Imaging Biomarker Standardization Initiative (IBSI) reporting structure of the study.

|                                           |                                                                                                                                                                                                                                                                                                                                                                                                                                                                                                                                                                                                                                                                                                                                                                                                                    |
|-------------------------------------------|--------------------------------------------------------------------------------------------------------------------------------------------------------------------------------------------------------------------------------------------------------------------------------------------------------------------------------------------------------------------------------------------------------------------------------------------------------------------------------------------------------------------------------------------------------------------------------------------------------------------------------------------------------------------------------------------------------------------------------------------------------------------------------------------------------------------|
| Patients                                  |                                                                                                                                                                                                                                                                                                                                                                                                                                                                                                                                                                                                                                                                                                                                                                                                                    |
| Region of interest                        | CT positive lesion in stomach                                                                                                                                                                                                                                                                                                                                                                                                                                                                                                                                                                                                                                                                                                                                                                                      |
| Patient Preparation                       | Patients were required to drink enough water before CT examination to ensure sufficient distention of gastric cavity in CT images                                                                                                                                                                                                                                                                                                                                                                                                                                                                                                                                                                                                                                                                                  |
| Computed tomography (CT) developing agent | iodinated contrast material                                                                                                                                                                                                                                                                                                                                                                                                                                                                                                                                                                                                                                                                                                                                                                                        |
| Acquisition and Reconstruction            |                                                                                                                                                                                                                                                                                                                                                                                                                                                                                                                                                                                                                                                                                                                                                                                                                    |
| Protocol                                  | The acquisition parameters are as follows: 120 kV; 150-190 mAs; 0.5- or 0.4-second rotation time; field of view, 350×350 mm; matrix, 512×512. After routine non-enhanced CT, arterial and portal venous-phase contrast-enhanced CT were performed after delays of 28 s and 60 s following intravenous administration of 90 - 100 ml of iodinated contrast material (Ultravist 370, Bayer Schering Pharma, Berlin, Germany) at a rate of 3.0 or 3.5 ml/s with a pump injector (Ulrich CT Plus 150, Ulrich Medical, Ulm, Germany). Portal venous phase CT images (thickness: range from 1.25 mm to 7.5 mm) were retrieved from the picture archiving and communication system (PACS) (Carestream, Canada) for image feature extraction because of well differentiation of the tumor tissue from the adjacent tissue. |
| Scanner type                              | multidetector row CT systems                                                                                                                                                                                                                                                                                                                                                                                                                                                                                                                                                                                                                                                                                                                                                                                       |
| Delineation                               |                                                                                                                                                                                                                                                                                                                                                                                                                                                                                                                                                                                                                                                                                                                                                                                                                    |
| Software                                  | ITK-SNAP software (version 3.8; <a href="http://www.itksnap.org">www.itksnap.org</a> ).                                                                                                                                                                                                                                                                                                                                                                                                                                                                                                                                                                                                                                                                                                                            |
| ROI definition                            | Standard 2D ROI tools                                                                                                                                                                                                                                                                                                                                                                                                                                                                                                                                                                                                                                                                                                                                                                                              |
| Number of experts                         | 2 + 1 (2 experienced radiologists participated in independent delineations, followed by 1 senior radiologist cross-validation if necessary)                                                                                                                                                                                                                                                                                                                                                                                                                                                                                                                                                                                                                                                                        |
| Reference image                           | CT                                                                                                                                                                                                                                                                                                                                                                                                                                                                                                                                                                                                                                                                                                                                                                                                                 |
| Radiomics feature extraction              |                                                                                                                                                                                                                                                                                                                                                                                                                                                                                                                                                                                                                                                                                                                                                                                                                    |
| Software                                  | Matlab R2016a (The MathWorks Inc.)                                                                                                                                                                                                                                                                                                                                                                                                                                                                                                                                                                                                                                                                                                                                                                                 |
| Package                                   | radiomics analysis package ( <a href="https://github.com/yumingjiang/GC_RADIOMICS-.git">https://github.com/yumingjiang/GC_RADIOMICS-.git</a> )                                                                                                                                                                                                                                                                                                                                                                                                                                                                                                                                                                                                                                                                     |
| Method                                    | Reads the DICOM content of a single directory; Equal-probability quantization on the region of interest (ROI); computes Lloyd-Max quantization on the region of interest (ROI) of an input volume; computes uniform quantization on the region of interest (ROI) of an input volume; applies the intensity normalization scheme;                                                                                                                                                                                                                                                                                                                                                                                                                                                                                   |

|                       |                                                                                                                                                                                                                                                                         |
|-----------------------|-------------------------------------------------------------------------------------------------------------------------------------------------------------------------------------------------------------------------------------------------------------------------|
|                       | Computation of the smallest box containing region of interest (ROI), if necessary (ROIbox); Wavelet band-pass filtering (WBPf); Isotropic resampling; Quantization of intensity dynamic range.                                                                          |
| Discretization        | Bin width and LoG filters                                                                                                                                                                                                                                               |
| Bin width             | 25 for CT                                                                                                                                                                                                                                                               |
| Kernels of the filter | Gaussian spatial band-pass filter (V2G)                                                                                                                                                                                                                                 |
| Biomarker set         | intensity features, shape features, gray Level Co-occurrence Matrix-based (GLCM) features, gray Level Run Length Matrix-based (GLRLM) features, gray Level Size Zone Matrix-based (GLSZM) features and neighborhood Gray Tone Difference Matrix-based (NGTDM) features. |
| Exclusion criteria    | ICC smaller than 0.75                                                                                                                                                                                                                                                   |

### Supplementary Reference

1. Jiang Y, Zhang Q, Hu Y, et al. ImmunoScore Signature: A Prognostic and Predictive Tool in Gastric Cancer. *Ann Surg*. 2018;267:504-513.
2. Jiang Y, Xie J, Han Z, et al. Immunomarker Support Vector Machine Classifier for Prediction of Gastric Cancer Survival and Adjuvant Chemotherapeutic Benefit. *Clin Cancer Res*. 2018;24:5574-5584.
3. Jiang Y, Liu W, Li T, et al. Prognostic and Predictive Value of p21-activated Kinase 6 Associated Support Vector Machine Classifier in Gastric Cancer Treated by 5-fluorouracil/Oxaliplatin Chemotherapy. *EBioMedicine*. 2017;22:78-88.
